# Supplementary material
Source: ML conference proceedings conference paper supplement (https://proceedings.neurips.cc/paper_files/paper/2019/hash/aaebdb8bb6b0e73f6c3c54a0ab0c6415-Abstract.html)
Supplement: Supplementary file [file aaebdb8bb6b0e73f6c3c54a0ab0c6415-Supplemental.zip]

---

# Finite-time Analysis of Approximate Policy Iteration for the Linear Quadratic Regulator

---

**Karl Krauth**

University of California, Berkeley  
karlk@berkeley.edu

**Stephen Tu**

University of California, Berkeley  
stephentu@berkeley.edu

**Benjamin Recht**

University of California, Berkeley  
brecht@berkeley.edu

## Abstract

We study the sample complexity of approximate policy iteration (PI) for the Linear Quadratic Regulator (LQR), building on a recent line of work using LQR as a testbed to understand the limits of reinforcement learning (RL) algorithms on continuous control tasks. Our analysis quantifies the tension between policy improvement and policy evaluation, and suggests that policy evaluation is the dominant factor in terms of sample complexity. Specifically, we show that to obtain a controller that is within  $\varepsilon$  of the optimal LQR controller, each step of policy evaluation requires at most  $(n + d)^3/\varepsilon^2$  samples, where  $n$  is the dimension of the state vector and  $d$  is the dimension of the input vector. On the other hand, only  $\log(1/\varepsilon)$  policy improvement steps suffice, resulting in an overall sample complexity of  $(n + d)^3\varepsilon^{-2}\log(1/\varepsilon)$ . We furthermore build on our analysis and construct a simple adaptive procedure based on  $\varepsilon$ -greedy exploration which relies on approximate PI as a sub-routine and obtains  $T^{2/3}$  regret, improving upon a recent result of Abbasi-Yadkori et al. [3].

## 1 Introduction

With the recent successes of reinforcement learning (RL) on continuous control tasks, there has been a renewed interest in understanding the sample complexity of RL methods. A recent line of work has focused on the Linear Quadratic Regulator (LQR) as a testbed to understand the behavior and trade-offs of various RL algorithms in the continuous state and action space setting. These results can be broadly grouped into two categories: (1) the study of *model-based* methods which use data to build an estimate of the transition dynamics, and (2) *model-free* methods which directly estimate the optimal feedback controller from data without building a dynamics model as an intermediate step. Much of the recent progress in LQR has focused on the model-based side, with an analysis of robust control from Dean et al. [12] and certainty equivalence control by Fiechter [17] and Mania et al. [26]. These techniques have also been extended to the online, adaptive setting [1, 4, 11, 13, 31]. On the other hand, for classic model-free RL algorithms such as Q-learning, SARSA, and approximate policy iteration (PI), our understanding is much less complete within the context of LQR. This is despite the fact that these algorithms are well understood in the tabular (finite state and action space) setting. Indeed, most of the model-free analysis for LQR [16, 24, 35] has focused exclusively on derivative-free random search methods.

In this paper, we extend our understanding of model-free algorithms for LQR by studying the performance of approximate PI on LQR, which is a classic approximate dynamic programming algorithm. Approximate PI is a model-free algorithm which iteratively uses trajectory data to estimate

the state-value function associated to the current policy (via e.g. temporal difference learning), and then uses this estimate to greedily improve the policy. A key issue in analyzing approximate PI is to understand the trade-off between the number of policy improvement iterations, and the amount of data to collect for each policy evaluation phase. Our analysis quantifies this trade-off, showing that if least-squares temporal difference learning (LSTD-Q) [9, 20] is used for policy evaluation, then a trajectory of length  $\tilde{O}((n+d)^3/\varepsilon^2)$  for each inner step of policy evaluation combined with  $\mathcal{O}(\log(1/\varepsilon))$  outer steps of policy improvement suffices to learn a controller that has  $\varepsilon$ -error from the optimal controller. This yields an overall sample complexity of  $\mathcal{O}((n+d)^3\varepsilon^{-2}\log(1/\varepsilon))$ . Prior to our work, the only known guarantee for approximate PI on LQR was the asymptotic consistency result of Bradtke [10] in the setting of no process noise.

We also extend our analysis of approximate PI to the online, adaptive LQR setting popularized by Abbasi-Yadkori and Szepesvári [1]. By using a greedy exploration scheme similar to Dean et al. [13] and Mania et al. [26], we prove a  $\tilde{O}(T^{2/3})$  regret bound for a simple adaptive policy improvement algorithm. While the  $T^{2/3}$  rate is sub-optimal compared to the  $T^{1/2}$  regret from model-based methods [1, 11, 26], our analysis improves the  $\tilde{O}(T^{2/3+\varepsilon})$  regret (for  $T \geq C^{1/\varepsilon}$ ) from the model-free Follow the Leader (FTL) algorithm of Abbasi-Yadkori et al. [3]. To the best of our knowledge, we give the best regret guarantee known for a model-free algorithm. We leave open the question of whether or not a model-free algorithm can achieve optimal  $T^{1/2}$  regret.

## 2 Main Results

In this paper, we consider the following linear dynamical system:

$$x_{t+1} = Ax_t + Bu_t + w_t, \quad w_t \sim \mathcal{N}(0, \sigma_w^2 I), \quad x_0 \sim \mathcal{N}(0, \Sigma_0). \quad (2.1)$$

We let  $n$  denote the dimension of the state  $x_t$  and  $d$  denote the dimension of the input  $u_t$ . For simplicity we assume that  $d \leq n$ , e.g. the system is under-actuated. We fix two positive definite cost matrices  $(S, R)$ , and consider the infinite horizon average-cost Linear Quadratic Regulator (LQR):

$$J_\star := \min_{\{u_t(\cdot)\}} \lim_{T \rightarrow \infty} \mathbb{E} \left[ \frac{1}{T} \sum_{t=1}^T x_t^\top S x_t + u_t^\top R u_t \right] \quad \text{subject to (2.1)}. \quad (2.2)$$

We assume the dynamics matrices  $(A, B)$  are unknown to us, and our method of interaction with (2.1) is to choose an input sequence  $\{u_t\}$  and observe the resulting states  $\{x_t\}$ .

We study the solution to (2.2) using *least-squares policy iteration (LSPI)*, a well-known approximate dynamic programming method in RL introduced by Lagoudakis and Parr [20]. The study of approximate PI on LQR dates back to the Ph.D. thesis of Bradtke [10], where he showed that for *noiseless* LQR (when  $w_t = 0$  for all  $t$ ), the approximate PI algorithm is asymptotically consistent. In this paper we expand on this result and quantify non-asymptotic rates for approximate PI on LQR. Proofs of all results can be found in the extended version of this paper [19].

**Notation.** For a positive scalar  $x > 0$ , we let  $x_+ = \max\{1, x\}$ . A square matrix  $L$  is called stable if  $\rho(L) < 1$  where  $\rho(\cdot)$  denotes the spectral radius of  $L$ . For a symmetric matrix  $M \in \mathbb{R}^{n \times n}$ , we let  $\text{dlyap}(L, M)$  denote the unique solution to the discrete Lyapunov equation  $P = L^\top P L + M$ . We also let  $\text{svec}(M) \in \mathbb{R}^{n(n+1)/2}$  denote the vectorized version of the upper triangular part of  $M$  so that  $\|M\|_F^2 = \langle \text{svec}(M), \text{svec}(M) \rangle$ . Finally,  $\text{smat}(\cdot)$  denotes the inverse of  $\text{svec}(\cdot)$ , so that  $\text{smat}(\text{svec}(M)) = M$ .

### 2.1 Least-Squares Temporal Difference Learning (LSTD-Q)

The first component towards an understanding of approximate PI is to understand least-squares temporal difference learning (LSTD-Q) for  $Q$ -functions, which is the fundamental building block of LSPI. Given a deterministic policy  $K_{\text{eval}}$  which stabilizes  $(A, B)$ , the goal of LSTD-Q is to estimate the parameters of the  $Q$ -function associated to  $K_{\text{eval}}$ . Bellman's equation for infinite-horizon average cost MDPs (c.f. Bertsekas [6]) states that the (relative)  $Q$ -function associated to a policy  $\pi$  satisfies the following fixed-point equation:

$$\lambda + Q(x, u) = c(x, u) + \mathbb{E}_{x' \sim p(\cdot|x, u)} [Q(x', \pi(x'))]. \quad (2.3)$$

Here,  $\lambda \in \mathbb{R}$  is a free parameter chosen so that the fixed-point equation holds. LSTD-Q operates under the *linear architecture* assumption, which states that the  $Q$ -function can be described as  $Q(x, u) = q^\top \phi(x, u)$ , for a known (possibly non-linear) feature map  $\phi(x, u)$ . It is well known that LQR satisfies the linear architecture assumption, since we have:

$$Q(x, u) = \text{svec}(Q)^\top \text{svec} \left( \begin{bmatrix} x \\ u \end{bmatrix} \begin{bmatrix} x \\ u \end{bmatrix}^\top \right), \quad Q = \begin{bmatrix} S & 0 \\ 0 & R \end{bmatrix} + \begin{bmatrix} A^\top \\ B^\top \end{bmatrix} V \begin{bmatrix} A & B \end{bmatrix},$$

$$V = \text{dlyap}(A + BK_{\text{eval}}, S + K_{\text{eval}}^\top RK_{\text{eval}}), \quad \lambda = \left\langle Q, \sigma_w^2 \begin{bmatrix} I \\ K_{\text{eval}} \end{bmatrix} \begin{bmatrix} I \\ K_{\text{eval}} \end{bmatrix}^\top \right\rangle.$$

Here, we slightly abuse notation and let  $Q$  denote the  $Q$ -function and also the matrix parameterizing the  $Q$ -function. Now suppose that a trajectory  $\{(x_t, u_t, x_{t+1})\}_{t=1}^T$  is collected. Note that LSTD-Q is an *off-policy* method (unlike the closely related LSTD estimator for value functions), and therefore the inputs  $u_t$  can come from any sequence that provides sufficient excitation for learning. In particular, it does *not* have to come from the policy  $K_{\text{eval}}$ . In this paper, we will consider inputs of the form:

$$u_t = K_{\text{play}} x_t + \eta_t, \quad \eta_t \sim \mathcal{N}(0, \sigma_\eta^2 I), \quad (2.4)$$

where  $K_{\text{play}}$  is a stabilizing controller for  $(A, B)$ . Once again we emphasize that  $K_{\text{play}} \neq K_{\text{eval}}$  in general. Furthermore, the policy under  $K_{\text{eval}}$  is stochastic while the policy under  $K_{\text{play}}$  is stochastic, where the injected noise  $\eta_t$  is needed in order to provide sufficient excitation for learning. In order to describe the LSTD-Q estimator, we define the following quantities which play a key role throughout the paper:

$$\phi_t := \phi(x_t, u_t), \quad \psi_t := \phi(x_t, K_{\text{eval}} x_t),$$

$$f := \text{svec} \left( \sigma_w^2 \begin{bmatrix} I \\ K_{\text{eval}} \end{bmatrix} \begin{bmatrix} I \\ K_{\text{eval}} \end{bmatrix}^\top \right), \quad c_t := x_t^\top S x_t + u_t^\top R u_t.$$

The LSTD-Q estimator estimates  $q$  via:

$$\hat{q} := \left( \sum_{t=1}^T \phi_t (\phi_t - \psi_{t+1} + f)^\top \right)^\dagger \sum_{t=1}^T \phi_t c_t. \quad (2.5)$$

Here,  $(\cdot)^\dagger$  denotes the Moore-Penrose pseudo-inverse. Our first result establishes a non-asymptotic bound on the quality of the estimator  $\hat{q}$ , measured in terms of  $\|\hat{q} - q\|$ . Before we state our result, we introduce a key definition that we will use extensively.

**Definition 1.** Let  $L$  be a square matrix. Let  $\tau \geq 1$  and  $\rho \in (0, 1)$ . We say that  $L$  is  $(\tau, \rho)$ -stable if

$$\|L^k\| \leq \tau \rho^k, \quad k = 0, 1, 2, \dots$$

While stability of a matrix is an asymptotic notion, Definition 1 quantifies the degree of stability by characterizing the transient response of the powers of a matrix by the parameter  $\tau$ . It is closely related to the notion of *strong stability* from Cohen et al. [11].

With Definition 1 in place, we state our first result for LSTD-Q.

**Theorem 2.1.** Fix a  $\delta \in (0, 1)$ . Let policies  $K_{\text{play}}$  and  $K_{\text{eval}}$  stabilize  $(A, B)$ , and assume that both  $A + BK_{\text{play}}$  and  $A + BK_{\text{eval}}$  are  $(\tau, \rho)$ -stable. Let the initial state  $x_0 \sim \mathcal{N}(0, \Sigma_0)$  and consider the inputs  $u_t = K_{\text{play}} x_t + \eta_t$  with  $\eta_t \sim \mathcal{N}(0, \sigma_\eta^2 I)$ . For simplicity, assume that  $\sigma_\eta \leq \sigma_w$ . Let  $P_\infty$  denote the steady-state covariance of the trajectory  $\{x_t\}$ :

$$P_\infty = \text{dlyap}((A + BK_{\text{play}})^\top, \sigma_w^2 I + \sigma_\eta^2 B B^\top). \quad (2.6)$$

Define the proxy variance  $\bar{\sigma}^2$  by:

$$\bar{\sigma}^2 := \tau^2 \rho^4 \|\Sigma_0\| + \|P_\infty\| + \sigma_\eta^2 \|B\|^2. \quad (2.7)$$

Suppose that  $T$  satisfies:

$$T \geq \tilde{O}(1) \max \left\{ (n+d)^2, \frac{\tau^4}{\rho^4(1-\rho^2)^2} \frac{(n+d)^4}{\sigma_\eta^4} \sigma_w^2 \bar{\sigma}^2 \|K_{\text{play}}\|_+^4 \|K_{\text{eval}}\|_+^8 (\|A\|^4 + \|B\|^4)_+ \right\}. \quad (2.8)$$

Then we have with probability at least  $1 - \delta$ ,

$$\|\hat{q} - q\| \leq \tilde{O}(1) \frac{\tau^2}{\rho^2(1 - \rho^2)} \frac{(n + d)}{\sigma_\eta^2 \sqrt{T}} \sigma_w \bar{\sigma} \|K_{\text{play}}\|_+^2 \|K_{\text{eval}}\|_+^4 (\|A\|^2 + \|B\|^2) + \|Q^{K_{\text{eval}}}\|_F. \quad (2.9)$$

Here the  $\tilde{O}(1)$  hides  $\text{polylog}(n, \tau, \|\Sigma_0\|, \|P_\infty\|, \|K_{\text{play}}\|, T/\delta, 1/\sigma_\eta)$  factors.

Theorem 2.1 states that:

$$T \leq \tilde{O} \left( (n + d)^4, \frac{1}{\sigma_\eta^4} \frac{(n + d)^3}{\varepsilon^2} \right)$$

timesteps are sufficient to achieve error  $\|\hat{q} - q\| \leq \varepsilon$  w.h.p. Several remarks are in order. First, while the  $(n + d)^4$  burn-in is likely sub-optimal, the  $(n + d)^3/\varepsilon^2$  dependence is sharp as shown by the asymptotic results of Tu and Recht [35]. Second, the  $1/\sigma_\eta^4$  dependence on the injected excitation noise will be important when we study the online, adaptive setting in Section 2.3. We leave improving the polynomial dependence of the burn-in period to future work.

The proof of Theorem 2.1 rests on top of several recent advances. First, we build off the work of Abbasi-Yadkori et al. [3] to derive a new basic inequality for LSTD-Q which serves as a starting point for the analysis. Next, we combine the small-ball techniques of Simchowitz et al. [33] with the self-normalized martingale inequalities of Abbasi-Yadkori et al. [2]. While an analysis of LSTD-Q is presented in Abbasi-Yadkori et al. [3] (which builds on the analysis for LSTD from Tu and Recht [34]), a direct application of their result yields a  $1/\sigma_\eta^8$  dependence; the use of self-normalized inequalities is necessary in order to reduce this dependence to  $1/\sigma_\eta^4$ .

## 2.2 Least-Squares Policy Iteration (LSPI)

With Theorem 2.1 in place, we are ready to present the main results for LSPI. We describe two versions of LSPI in Algorithm 1 and Algorithm 2.

---

### Algorithm 1 LSPIv1 for LQR

---

**Input:**  $K_0$ : initial stabilizing controller,  
 $N$ : number of policy iterations,  
 $T$ : length of rollout,  
 $\sigma_\eta^2$ : exploration variance,  
 $\mu$ : lower eigenvalue bound.

- 1: Collect  $\mathcal{D} = \{(x_k, u_k, x_{k+1})\}_{k=1}^T$  with input  $u_k = K_0 x_k + \eta_k, \eta_k \sim \mathcal{N}(0, \sigma_\eta^2 I)$ .
- 2: **for**  $t = 0, \dots, N - 1$  **do**
- 3:    $\hat{Q}_t = \text{Proj}_\mu(\text{LSTDQ}(\mathcal{D}, K_t))$ .
- 4:    $K_{t+1} = G(\hat{Q}_t)$ . [See (2.10).]
- 5: **end for**
- 6: **return**  $K_N$ .

---



---

### Algorithm 2 LSPIv2 for LQR

---

**Input:**  $K_0$ : initial stabilizing controller,  
 $N$ : number of policy iterations,  
 $T$ : length of rollout,  
 $\sigma_\eta^2$ : exploration variance,  
 $\mu$ : lower eigenvalue bound.

- 1: **for**  $t = 0, \dots, N - 1$  **do**
- 2:   Collect  $\mathcal{D}_t = \{(x_k^{(t)}, u_k^{(t)}, x_{k+1}^{(t)})\}_{k=1}^T$ ,  
 $u_k^{(t)} = K_0 x_k^{(t)} + \eta_k^{(t)}, \eta_k^{(t)} \sim \mathcal{N}(0, \sigma_\eta^2 I)$ .
- 3:    $\hat{Q}_t = \text{Proj}_\mu(\text{LSTDQ}(\mathcal{D}_t, K_t))$ .
- 4:    $K_{t+1} = G(\hat{Q}_t)$ .
- 5: **end for**
- 6: **return**  $K_N$ .

---

In Algorithms 1 and 2,  $\text{Proj}_\mu(\cdot) = \arg \min_{X=X^\top: X \succeq \mu \cdot I} \|X - \cdot\|_F$  is the Euclidean projection onto the set of symmetric matrices lower bounded by  $\mu \cdot I$ . Furthermore, the map  $G(\cdot)$  takes an  $(n + d) \times (n + d)$  positive definite matrix and returns a  $d \times n$  matrix:

$$G \left( \begin{bmatrix} Q_{11} & Q_{12} \\ Q_{12}^\top & Q_{22} \end{bmatrix} \right) = -Q_{22}^{-1} Q_{12}^\top. \quad (2.10)$$

Algorithm 1 corresponds to the version presented in Lagoudakis and Parr [20], where all the data  $\mathcal{D}$  is collected up front and is re-used in every iteration of LSTD-Q. Algorithm 2 is the one we will analyze in this paper, where new data is collected for every iteration of LSTD-Q. The modification made in Algorithm 2 simplifies the analysis by allowing the controller  $K_t$  to be independent of the data  $\mathcal{D}_t$  in LSTD-Q. We remark that this does *not* require the system to be reset after every iteration of LSTD-Q. We leave analyzing Algorithm 1 to future work.

Before we state our main finite-sample guarantee for Algorithm 2, we review the notion of a (relative) value-function. Similarly to (relative)  $Q$ -functions, the infinite horizon average-cost Bellman equation states that the (relative) value function  $V$  associated to a policy  $\pi$  satisfies the fixed-point equation:

$$\lambda + V(x) = c(x, \pi(x)) + \mathbb{E}_{x' \sim p(\cdot | x, \pi(x))} [V(x')] . \quad (2.11)$$

For a stabilizing policy  $K$ , it is well known that for LQR the value function  $V(x) = x^\top V x$  with

$$V = \text{dlyap}(A + BK, S + K^\top RK) , \quad \lambda = \langle \sigma_w^2 I, V \rangle .$$

Once again as we did for  $Q$ -functions, we slightly abuse notation and let  $V$  denote the value function and the matrix that parameterizes the value function. Our main result for Algorithm 2 appears in the following theorem. For simplicity, we will assume that  $\|S\| \geq 1$  and  $\|R\| \geq 1$ .

**Theorem 2.2.** *Fix a  $\delta \in (0, 1)$ . Let the initial policy  $K_0$  input to Algorithm 2 stabilize  $(A, B)$ . Suppose the initial state  $x_0 \sim \mathcal{N}(0, \Sigma_0)$  and that the excitation noise satisfies  $\sigma_\eta \leq \sigma_w$ . Recall that the steady-state covariance of the trajectory  $\{x_t\}$  is*

$$P_\infty = \text{dlyap}((A + BK_0)^\top, \sigma_w^2 I + \sigma_\eta^2 BB^\top) .$$

*Let  $V_0$  denote the value function associated to the initial policy  $K_0$ , and  $V_\star$  denote the value function associated to the optimal policy  $K_\star$  for the LQR problem (2.2). Define the variables  $\mu, L$  as:*

$$\begin{aligned} \mu &:= \min\{\lambda_{\min}(S), \lambda_{\min}(R)\} , \\ L &:= \max\{\|S\|, \|R\|\} + 2(\|A\|^2 + \|B\|^2 + 1)\|V_0\|_+ . \end{aligned}$$

*Fix an  $\varepsilon > 0$  that satisfies:*

$$\varepsilon \leq 5 \left( \frac{L}{\mu} \right)^2 \min \left\{ 1, \frac{2 \log(\|V_0\|/\lambda_{\min}(V_\star))}{e}, \frac{\|V_\star\|^2}{8\mu^2 \log(\|V_0\|/\lambda_{\min}(V_\star))} \right\} . \quad (2.12)$$

*Suppose we run Algorithm 2 for  $N := N_0 + 1$  policy improvement iterations where*

$$N_0 := \left\lceil (1 + L/\mu) \log \left( \frac{2 \log(\|V_0\|/\lambda_{\min}(V_\star))}{\varepsilon} \right) \right\rceil , \quad (2.13)$$

*and we set the rollout length  $T$  to satisfy:*

$$\begin{aligned} T &\geq \tilde{O}(1) \max \left\{ (n+d)^2, \right. \\ &\quad \frac{L^2}{(1 - \mu/L)^2} \left( \frac{L}{\mu} \right)^{17} \frac{(n+d)^4}{\sigma_\eta^4} \sigma_w^2 (\|\Sigma_0\| + \|P_\infty\| + \sigma_\eta^2 \|B\|^2), \\ &\quad \left. \frac{1}{\varepsilon^2} \frac{L^4}{(1 - \mu/L)^2} \left( \frac{L}{\mu} \right)^{42} \frac{(n+d)^3}{\sigma_\eta^4} \sigma_w^2 (\|\Sigma_0\| + \|P_\infty\| + \sigma_\eta^2 \|B\|^2) \right\} . \end{aligned} \quad (2.14)$$

*Then with probability  $1 - \delta$ , we have that each policy  $K_t$  for  $t = 1, \dots, N$  stabilizes  $(A, B)$  and furthermore:*

$$\|K_N - K_\star\| \leq \varepsilon .$$

*Here the  $\tilde{O}(1)$  hides  $\text{polylog}(n, \tau, \|\Sigma_0\|, \|P_\infty\|, L/\mu, T/\delta, N_0, 1/\sigma_\eta)$  factors.*

Theorem 2.2 states roughly that  $T \cdot N \leq \tilde{O}(\frac{(n+d)^3}{\varepsilon^2} \log(1/\varepsilon))$  samples are sufficient for LSPI to recover a controller  $K$  that is within  $\varepsilon$  of the optimal  $K_\star$ . That is, only  $\log(1/\varepsilon)$  iterations of policy improvement are necessary, and furthermore more iterations of policy improvement do not necessary help due to the inherent statistical noise of estimating the  $Q$ -function for every policy  $K_t$ . We note that the polynomial factor in  $L/\mu$  is by no means optimal and was deliberately made quite conservative in order to simplify the presentation of the bound. A sharper bound can be recovered from our analysis techniques at the expense of a less concise expression.

It is worth taking a moment to compare Theorem 2.2 to classical results in the RL literature regarding approximate policy iteration. For example, a well known result (c.f. Theorem 7.1 of Lagoudakis and

Parr [20]) states that if LSTD-Q is able to return  $Q$ -function estimates with error  $L_\infty$  bounded by  $\varepsilon$  at every iteration, then letting  $\widehat{Q}_t$  denote the approximate  $Q$ -function at the  $t$ -th iteration of LSPI:

$$\limsup_{t \rightarrow \infty} \|\widehat{Q}_t - Q_\star\|_\infty \leq \frac{2\gamma\varepsilon}{(1-\gamma)^2}. \quad (2.15)$$

Here,  $\gamma$  is the discount factor of the MDP. Theorem 2.2 is qualitatively similar to this result in that we show roughly that  $\varepsilon$  error in the  $Q$ -function estimate translates to  $\varepsilon$  error in the estimated policy. However, there are several fundamental differences. First, our analysis does not rely on discounting to show contraction of the Bellman operator. Instead, we use the  $(\tau, \rho)$ -stability of closed loop system to achieve this effect. Second, our analysis does not rely on  $L_\infty$  bounds on the estimated  $Q$ -function, although we remark that similar type of results to (2.15) exist also in  $L_p$  (see e.g. [27, 29]). Finally, our analysis is non-asymptotic.

The proof of Theorem 2.2 combines the estimation guarantee of Theorem 2.1 with a new analysis of policy iteration for LQR, which we believe is of independent interest. Our new policy iteration analysis combines the work of Bertsekas [7] on policy iteration in infinite horizon average cost MDPs with the contraction theory of Lee and Lim [22] for non-linear matrix equations.

### 2.3 LSPI for Adaptive LQR

We now turn our attention to the online, adaptive LQR problem as studied in Abbasi-Yadkori and Szepesvári [1]. In the adaptive LQR problem, the quantity of interest is the *regret*, defined as:

$$\text{Regret}(T) := \sum_{t=1}^T x_t^\top S x_t + u_t^\top R u_t - T \cdot J_\star. \quad (2.16)$$

Here, the algorithm is penalized for the cost incurred from learning the optimal policy  $K_\star$ , and must balance exploration (to better learn the optimal policy) versus exploitation (to reduce cost). As mentioned previously, there are several known algorithms which achieve  $\tilde{O}(\sqrt{T})$  regret [1, 4, 11, 26, 31]. However, these algorithms operate in a *model-based* manner, using the collected data to build a confidence interval around the true dynamics  $(A, B)$ . On the other hand, the performance of adaptive algorithms which are *model-free* is less well understood. We use the results of the previous section to give an adaptive model-free algorithm for LQR which achieves  $\tilde{O}(T^{2/3})$  regret, which improves upon the  $\tilde{O}(T^{2/3+\varepsilon})$  regret (for  $T \geq C^{1/\varepsilon}$ ) achieved by the adaptive model-free algorithm of Abbasi-Yadkori et al. [3]. Our adaptive algorithm based on LSPI is shown in Algorithm 3.

---

#### Algorithm 3 Online Adaptive Model-free LQR Algorithm

---

**Input:** Initial stabilizing controller  $K^{(0)}$ , number of epochs  $E$ , epoch multiplier  $T_{\text{mult}}$ , lower eigenvalue bound  $\mu$ .

- 1: **for**  $i = 0, \dots, E - 1$  **do**
  - 2:   Set  $T_i = T_{\text{mult}} 2^i$ .
  - 3:   Set  $\sigma_{\eta,i}^2 = \sigma_w^2 \left(\frac{1}{2^i}\right)^{1/3}$ .
  - 4:   Set  $K^{(i+1)} = \text{LSPIv2}(K_0 = K^{(i)}, N = \tilde{O}((i+1)\Gamma_\star/\mu), T = T_i, \sigma_\eta^2 = \sigma_{\eta,i}^2)$ .
  - 5: **end for**
- 

Using an analysis technique similar to that in Dean et al. [13], we prove the following  $\tilde{O}(T^{2/3})$  regret bound for Algorithm 3.

**Theorem 2.3.** Fix a  $\delta \in (0, 1)$ . Let the initial feedback  $K^{(0)}$  stabilize  $(A, B)$  and let  $V^{(0)}$  denote its associated value function. Also let  $K_\star$  denote the optimal LQR controller and let  $V_\star$  denote the optimal value function. Let  $\Gamma_\star = 1 + \max\{\|A\|, \|B\|, \|V^{(0)}\|, \|V_\star\|, \|K^{(0)}\|, \|K_\star\|, \|Q\|, \|R\|\}$ . Suppose that  $T_{\text{mult}}$  is set to:

$$T_{\text{mult}} \geq \tilde{O}(1) \text{poly}(\Gamma_\star, n, d, 1/\lambda_{\min}(S)).$$

and suppose  $\mu$  is set to  $\mu = \min\{\lambda_{\min}(S), \lambda_{\min}(R)\}$ . With probability at least  $1 - \delta$ , we have that the regret of Algorithm 3 satisfies:

$$\text{Regret}(T) \leq \tilde{O}(1) \text{poly}(\Gamma_\star, n, d, 1/\lambda_{\min}(S)) T^{2/3}.$$



We note that the regret scaling as  $T^{2/3}$  in Theorem 2.3 is due to the  $1/\sigma_\eta^4$  dependence from LSTD-Q (c.f. (2.9)). As mentioned previously, the existing LSTD-Q analysis from Abbasi-Yadkori et al. [3] yields a  $1/\sigma_\eta^8$  dependence in LSTD-Q; using this  $1/\sigma_\eta^8$  dependence in the analysis of Algorithm 3 would translate into  $T^{4/5}$  regret.

### 3 Related Work

For model-based methods, in the offline setting Fiechter [17] provided the first PAC-learning bound for infinite horizon *discounted* LQR using certainty equivalence (nominal) control. Later, Dean et al. [12] use tools from robust control to analyze a robust synthesis method for infinite horizon *average cost* LQR, which is applicable in regimes of moderate uncertainty when nominal control fails. Mania et al. [26] show that certainty equivalence control actually provides a fast  $\mathcal{O}(\varepsilon^2)$  rate of sub-optimality where  $\varepsilon$  is the size of the parameter error, unlike the  $\mathcal{O}(\varepsilon)$  sub-optimality guarantee of [12, 17]. For the online adaptive setting, [1, 4, 11, 18, 26] give  $\tilde{\mathcal{O}}(\sqrt{T})$  regret algorithms. A key component of model-based algorithms is being able to quantify a confidence interval for the parameter estimate, for which several recent works [14, 32, 33] provide non-asymptotic results.

Turning to model-free methods, Tu and Recht [34] study the behavior of least-squares temporal difference (LSTD) for learning the *discounted value* function associated to a stabilizing policy. They evaluate the LSPI algorithm studied in this paper empirically, but do not provide any analysis. In terms of policy optimization, most of the work has focused on derivative-free random search methods [16, 24]. Tu and Recht [35] study a special family of LQR instances and characterize the asymptotic behavior of both model-based certainty equivalent control versus policy gradients (REINFORCE), showing that policy gradients has polynomially worse sample complexity. Most related to our work is Abbasi-Yadkori et al. [3], who analyze a model-free algorithm for adaptive LQR based on ideas from online convex optimization. LSTD-Q is a sub-routine of their algorithm, and their analysis incurs a sub-optimal  $1/\sigma_\eta^8$  dependence on the injected exploration noise, which we improve to  $1/\sigma_\eta^4$  using self-normalized martingale inequalities [2]. This improvement allows us to use a simple greedy exploration strategy to obtain  $T^{2/3}$  regret. Finally, as mentioned earlier, the Ph.D. thesis of Bradtke [10] presents an asymptotic consistency argument for approximate PI for discounted LQR in the noiseless setting (i.e.  $w_t = 0$  for all  $t$ ).

For the general function approximation setting in RL, Antos et al. [5] and Lazaric et al. [21] analyze variants of LSPI for discounted MDPs where the state space is compact and the action space finite. In Lazaric et al. [21], the policy is greedily updated via an update operator that requires access to the underlying dynamics (and is therefore not implementable). Farahmand et al. [15] extend the results of Lazaric et al. [21] to when the function spaces considered are reproducing kernel Hilbert spaces. Zou et al. [37] give a finite-time analysis of both Q-learning and SARSA, combining the asymptotic analysis of Melo et al. [28] with the finite-time analysis of TD-learning from Bhandari et al. [8]. We note that checking the required assumptions to apply the results of Zou et al. [37] is non-trivial (c.f. Section 3.1, [28]). We are un-aware of any non-asymptotic analysis of LSPI in the *average cost* setting, which is more difficult as the Bellman operator is no longer a contraction.

Finally, we remark that our LSPI analysis relies on understanding exact policy iteration for LQR, which is closely related to the fixed-point Riccati recurrence (value iteration). An elegant analysis for value iteration is given by Lincoln and Rantzer [23]. Recently, Fazel et al. [16] show that exact policy iteration is a special case of Gauss-Newton and prove linear convergence results. Our analysis, on the other hand, is based on combining the fixed-point theory from Lee and Lim [22] with recent work on policy iteration for average cost problems from Bertsekas [7].

### 4 Experiments

We first look at the performance of LSPI in the non-adaptive setting (Section 2.2). Here, we compare LSPI to other popular model-free methods, and the model-based certainty equivalence (nominal) controller (c.f. [26]). For model-free, we look at policy gradients (REINFORCE) (c.f. [36]) and derivative-free optimization (c.f. [24, 25, 30]). A full description of the methods we compare to is given in the full paper [19].

We consider the LQR instance  $(A, B, S, R)$  with  $A = \begin{bmatrix} 0.95 & 0.01 & 0 \\ 0.01 & 0.95 & 0.01 \\ 0 & 0.01 & 0.95 \end{bmatrix}$ ,  $B = \begin{bmatrix} 1 & 0.1 \\ 0 & 0.1 \\ 0 & 0.1 \end{bmatrix}$ ,  $S = I_3$ , and  $R = I_2$ . We choose an LQR problem where the  $A$  matrix is stable, since the model-free methods we consider need to be seeded with an initial stabilizing controller; using a stable  $A$  allows us to start at  $K_0 = 0_{2 \times 3}$ . We fix the process noise  $\sigma_w = 1$ . The model-based nominal method learns  $(A, B)$  using least-squares, exciting the system with Gaussian inputs  $u_t$  with variance  $\sigma_u = 1$ .

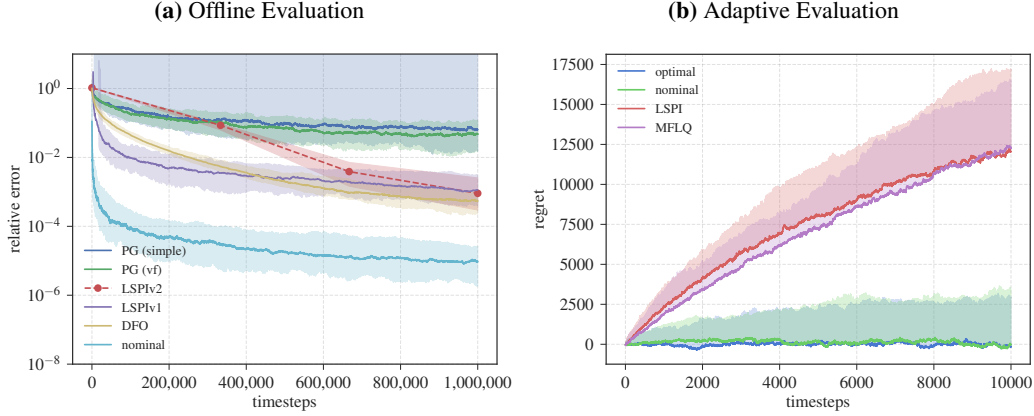

**Figure 1:** The performance of various model-free methods compared with the nominal controller. (a) Plot of non-adaptive performance. The shaded regions represent the lower 10th and upper 90th percentile over 100 trials, and the solid line represents the median performance. Here, PG (simple) is policy gradients with the simple baseline, PG (vf) is policy gradients with the value function baseline, LSPIv2 is Algorithm 2, LSPIv1 is Algorithm 1, and DFO is derivative-free optimization. (b) Plot of adaptive performance. The shaded regions represent the median to upper 90th percentile over 100 trials. Here, LSPI is Algorithm 3 using LSPIv1, MFLQ is from Abbasi-Yadkori et al. [3], nominal is the  $\varepsilon$ -greedy adaptive certainty equivalent controller (c.f. [13]), and optimal has access to the true dynamics.

For policy gradients and derivative-free optimization, we use the projected stochastic gradient descent (SGD) method with a constant step size  $\mu$  as the optimization procedure. For policy iteration, we evaluate both LSPIv1 (Algorithm 1) and LSPIv2 (Algorithm 2). For every iteration of LSTD-Q, we project the resulting  $Q$ -function parameter matrix onto the set  $\{Q : Q \succeq \gamma I\}$  with  $\gamma = \min\{\lambda_{\min}(S), \lambda_{\min}(R)\}$ . For LSPIv1, we choose  $N = 15$  by picking the  $N \in [5, 10, 15]$  which results in the best performance after  $T = 10^6$  timesteps. For LSPIv2, we set  $(N, T) = (3, 333333)$  which yields the lowest cost over the grid  $N \in [1, 2, 3, 4, 5, 6, 7]$  and  $T$  such that  $NT = 10^6$ .

Next, we compare the performance of LSPI in the adaptive setting (Section 2.3). We compare LSPI against the model-free linear quadratic control (MFLQ) algorithm of Abbasi-Yadkori et al. [3], nominal certainty equivalence controller (c.f. [13]), and the optimal controller. We use the example

of Dean et al. [12], with  $A = \begin{bmatrix} 1.01 & 0.01 & 0 \\ 0.01 & 1.01 & 0.01 \\ 0 & 0.01 & 1.01 \end{bmatrix}$ ,  $B = I$ ,  $S = 10I_3$ ,  $R = I_3$ , and  $\sigma_w = 1$ .

Figure 1 shows the results of these experiments. In Figure 1a, we plot the relative error  $(J(\hat{K}) - J_*)/J_*$  versus the number of timesteps. We see that the model-based certainty equivalence (nominal) method is more sample efficient than the other model-free methods considered. We also see that the value function baseline is able to dramatically reduce the variance of the policy gradient estimator compared to the simple baseline. The DFO method performs the best out of all the model-free methods considered on this example after  $10^6$  timesteps, although the performance of policy iteration is comparable. In Figure 1b, we plot the regret (c.f. Equation 2.16). We see that LSPI and MFLQ both perform similarly with MFLQ slightly outperforming LSPI. We also note that the model-based nominal methods performs significantly better than both LSPI and MFLQ.



## 5 Conclusion

We studied the sample complexity of approximate PI on LQR, showing that roughly  $(n + d)^3 \varepsilon^{-2} \log(1/\varepsilon)$  samples are sufficient to estimate a controller that is within  $\varepsilon$  of the optimal. We also show how to turn this offline method into an adaptive LQR method with  $T^{2/3}$  regret. Several questions remain open with our work. The first is if policy iteration is able to achieve  $T^{1/2}$  regret, which is possible with other model-based methods. The second is whether or not model-free methods provide advantages in situations of partial observability for LQ control. Finally, an asymptotic analysis of LSPI, in the spirit of Tu and Recht [35], is of interest in order to clarify which parts of our analysis are sub-optimal due to the techniques we use versus are inherent in the algorithm.

## Acknowledgments

We thank the anonymous reviewers for their valuable feedback. We also thank the authors of Abbasi-Yadkori et al. [3] for providing us with an implementation of their model-free LQ algorithm. ST is supported by a Google PhD fellowship. This work is generously supported in part by ONR awards N00014-17-1-2191, N00014-17-1-2401, and N00014-18-1-2833, the DARPA Assured Autonomy (FA8750-18-C-0101) and Lagrange (W911NF-16-1-0552) programs, a Siemens Futuremakers Fellowship, and an Amazon AWS AI Research Award.

## References

- [1] Y. Abbasi-Yadkori and C. Szepesvári. Regret Bounds for the Adaptive Control of Linear Quadratic Systems. In *Conference on Learning Theory*, 2011.
- [2] Y. Abbasi-Yadkori, D. Pál, and C. Szepesvári. Online Least Squares Estimation with Self-Normalized Processes: An Application to Bandit Problems. In *Conference on Learning Theory*, 2011.
- [3] Y. Abbasi-Yadkori, N. Lazić, and C. Szepesvári. Model-Free Linear Quadratic Control via Reduction to Expert Prediction. In *AISTATS*, 2019.
- [4] M. Abeille and A. Lazaric. Improved Regret Bounds for Thompson Sampling in Linear Quadratic Control Problems. In *International Conference on Machine Learning*, 2018.
- [5] F. Alzahrani and A. Salem. Sharp bounds for the Lambert  $W$  function. *Integral Transforms and Special Functions*, 29(12):971–978, 2018.
- [6] A. Antos, C. Szepesvári, and R. Munos. Learning near-optimal policies with Bellman-residual minimization based fitted policy iteration and a single sample path. *Machine Learning*, 71(1): 89–129, 2008.
- [7] D. P. Bertsekas. *Dynamic Programming and Optimal Control, Vol. II*. 2007.
- [8] D. P. Bertsekas. Value and Policy Iterations in Optimal Control and Adaptive Dynamic Programming. *IEEE Transactions on Neural Networks and Learning Systems*, 28(3):500–509, 2017.
- [9] J. Bhandari, D. Russo, and R. Singal. A Finite Time Analysis of Temporal Difference Learning With Linear Function Approximation. In *Conference on Learning Theory*, 2018.
- [10] V. I. Bogachev. *Gaussian Measures*. 2015.
- [11] J. Boyan. Least-Squares Temporal Difference Learning. In *International Conference on Machine Learning*, 1999.
- [12] S. J. Bradtko. *Incremental Dynamic Programming for On-Line Adaptive Optimal Control*. PhD thesis, University of Massachusetts Amherst, 1994.
- [13] A. Cohen, T. Koren, and Y. Mansour. Learning Linear-Quadratic Regulators Efficiently with only  $\sqrt{T}$  Regret. *arXiv:1902.06223*, 2019.

- [12] S. Dean, H. Mania, N. Matni, B. Recht, and S. Tu. On the Sample Complexity of the Linear Quadratic Regulator. *arXiv:1710.01688*, 2017.
- [13] S. Dean, H. Mania, N. Matni, B. Recht, and S. Tu. Regret Bounds for Robust Adaptive Control of the Linear Quadratic Regulator. In *Neural Information Processing Systems*, 2018.
- [14] M. K. S. Faradonbeh, A. Tewari, and G. Michailidis. Finite Time Identification in Unstable Linear Systems. *Automatica*, 96:342–353, 2018.
- [15] A. Farahmand, M. Ghavamzadeh, C. Szepesvári, and S. Mannor. Regularized Policy Iteration with Nonparametric Function Spaces. *Journal of Machine Learning Research*, 17(139):1–66, 2016.
- [16] M. Fazel, R. Ge, S. Kakade, and M. Mesbahi. Global Convergence of Policy Gradient Methods for the Linear Quadratic Regulator. In *International Conference on Machine Learning*, 2018.
- [17] C.-N. Fiechter. PAC Adaptive Control of Linear Systems. In *Conference on Learning Theory*, 1997.
- [18] M. Ibrahimi, A. Javanmard, and B. V. Roy. Efficient Reinforcement Learning for High Dimensional Linear Quadratic Systems. In *Neural Information Processing Systems*, 2012.
- [ ] T. Kailath, A. H. Sayed, and B. Hassibi. *Linear Estimation*. 2000.
- [19] K. Krauth, S. Tu, and B. Recht. Finite-time Analysis of Approximate Policy Iteration for the Linear Quadratic Regulator. *arXiv:1905.12842*, 2019.
- [20] M. G. Lagoudakis and R. Parr. Least-Squares Policy Iteration. *Journal of Machine Learning Research*, 4:1107–1149, 2003.
- [21] A. Lazaric, M. Ghavamzadeh, and R. Munos. Finite-Sample Analysis of Least-Squares Policy Iteration. *Journal of Machine Learning Research*, 13:3041–3074, 2012.
- [22] H. Lee and Y. Lim. Invariant metrics, contractions and nonlinear matrix equations. *Nonlinearity*, 21(4):857–878, 2008.
- [23] B. Lincoln and A. Rantzer. Relaxed Dynamic Programming. *IEEE Transactions on Automatic Control*, 51(8):1249–1260, 2006.
- [24] D. Malik, K. Bhatia, K. Khamaru, P. L. Bartlett, , and M. J. Wainwright. Derivative-Free Methods for Policy Optimization: Guarantees for Linear Quadratic Systems. In *AISTATS*, 2019.
- [25] H. Mania, A. Guy, and B. Recht. Simple random search provides a competitive approach to reinforcement learning. In *Neural Information Processing Systems*, 2018.
- [26] H. Mania, S. Tu, and B. Recht. Certainty Equivalent Control of LQR is Efficient. *arXiv:1902.07826*, 2019.
- [27] A. massoud Farahmand, R. Munos, and C. Szepesvári. Error Propagation for Approximate Policy and Value Iteration. In *Neural Information Processing Systems*, 2010.
- [28] F. S. Melo, S. P. Meyn, and M. I. Ribeiro. An Analysis of Reinforcement Learning with Function Approximation. In *International Conference on Machine Learning*, 2008.
- [29] R. Munos. Error Bounds for Approximate Policy Iteration. In *International Conference on Machine Learning*, 2003.
- [30] Y. Nesterov and V. Spokoiny. Random Gradient-Free Minimization of Convex Functions. *Foundations of Computational Mathematics*, 17(2):527–566, 2017.
- [31] Y. Ouyang, M. Gagrani, and R. Jain. Control of unknown linear systems with Thompson sampling. In *55th Annual Allerton Conference on Communication, Control, and Computing*, 2017.
- [ ] M. Rudelson and R. Vershynin. Hanson-Wright inequality and sub-gaussian concentration. *Electronic Communications in Probability*, 18(82):1–9, 2013.

- [32] T. Sarkar and A. Rakhlin. Near optimal finite time identification of arbitrary linear dynamical systems. In *International Conference on Machine Learning*, 2019.
- [ ] K. Schäcke. On the Kronecker Product. Master’s thesis, University of Waterloo, 2004.
- [33] M. Simchowitz, H. Mania, S. Tu, M. I. Jordan, and B. Recht. Learning Without Mixing: Towards A Sharp Analysis of Linear System Identification. In *Conference on Learning Theory*, 2018.
- [34] S. Tu and B. Recht. Least-Squares Temporal Difference Learning for the Linear Quadratic Regulator. In *International Conference on Machine Learning*, 2018.
- [35] S. Tu and B. Recht. The Gap Between Model-Based and Model-Free Methods on the Linear Quadratic Regulator: An Asymptotic Viewpoint. In *Conference on Learning Theory*, 2019.
- [36] R. J. Williams. Simple statistical gradient-following algorithms for connectionist reinforcement learning. *Machine Learning*, 8(3–4):229–246, 1992.
- [37] S. Zou, T. Xu, and Y. Liang. Finite-Sample Analysis for SARSA and Q-Learning with Linear Function Approximation. *arXiv:1902.02234*, 2019.

## A Analysis for LSTD-Q

We fix a trajectory  $\{(x_t, u_t, x_{t+1})\}_{t=1}^T$ . Recall that we are interested in finding the  $Q$  function for a given policy  $K_{\text{eval}}$ , and we have defined the vectors:

$$\begin{aligned} \phi_t &= \phi(x_t, u_t), \quad \psi_t = \phi(x_t, K_{\text{eval}}x_t), \\ f &= \text{svec} \left( \sigma_w^2 \begin{bmatrix} I \\ K_{\text{eval}} \end{bmatrix} \begin{bmatrix} I \\ K_{\text{eval}} \end{bmatrix}^\top \right), \quad c_t = x_t^\top S x_t + u_t^\top R u_t. \end{aligned}$$

Also recall that the input sequence  $u_t$  being played is given by  $u_t = K_{\text{play}}x_t + \eta_t$ , with  $\eta_t \sim \mathcal{N}(0, \sigma_\eta^2 I)$ . Both policies  $K_{\text{eval}}$  and  $K_{\text{play}}$  are assumed to stabilize  $(A, B)$ . Because of stability, we have that  $P_t$  converges to a limit  $P_\infty = \text{dlyap}((A + BK_{\text{play}})^\top, \sigma_w^2 I + \sigma_\eta^2 BB^\top)$ , where  $P_t$  is:

$$P_t := \sum_{k=0}^{t-1} (A + BK_{\text{play}})^k (\sigma_w^2 I + \sigma_\eta^2 BB^\top) ((A + BK_{\text{play}})^\top)^k.$$

The covariance of  $x_t$  for  $t \geq 1$  is:

$$\text{Cov}(x_t) = \Sigma_t := P_t + (A + BK_{\text{play}})^t \Sigma_0 ((A + BK_{\text{play}})^\top)^t.$$

We define the following data matrices:

$$\Phi = \begin{bmatrix} -\phi_1^\top - \\ \vdots \\ -\phi_T^\top - \end{bmatrix}, \quad \Psi_+ = \begin{bmatrix} -\psi_2^\top - \\ \vdots \\ -\psi_{T+1}^\top - \end{bmatrix}, \quad c = (c_1, \dots, c_T)^\top, \quad F = \begin{bmatrix} -f^\top - \\ \vdots \\ -f^\top - \end{bmatrix}.$$

With this notation, the LSTD-Q estimator is:

$$\hat{q} = (\Phi^\top (\Phi - \Psi_+ + F))^\dagger \Phi^\top c.$$

Next, let  $\Xi$  be the matrix:

$$\Xi = \begin{bmatrix} -\mathbb{E}[\phi(x_2, K_{\text{eval}}x_2)|x_1, u_1]^\top - \\ \vdots \\ -\mathbb{E}[\phi(x_{T+1}, K_{\text{eval}}x_{T+1})|x_T, u_T]^\top - \end{bmatrix}.$$

For what follows, we let the notation  $\otimes_s$  denote the *symmetric* Kronecker product. See [?] for more details. The following lemma gives us a starting point for analysis. It is based on Lemma 4.1 of Abbasi-Yadkori et al. [3]. Recall that  $q = \text{svec}(Q)$  and  $Q$  is the matrix which parameterizes the  $Q$ -function for  $K_{\text{eval}}$ .

**Lemma A.1** (Lemma 4.1, [3]). *Let  $L := \begin{bmatrix} I \\ K_{\text{eval}} \end{bmatrix} [A \quad B]$ . Suppose that  $\Phi$  has full column rank, and that*

$$\frac{\|(\Phi^\top \Phi)^{-1/2} \Phi^\top (\Xi - \Psi_+)\|}{\sigma_{\min}(\Phi) \sigma_{\min}(I - L \otimes_s L)} \leq 1/2.$$

Then we have:

$$\|\hat{q} - q\| \leq 2 \frac{\|(\Phi^\top \Phi)^{-1/2} \Phi^\top (\Xi - \Psi_+) q\|}{\sigma_{\min}(\Phi) \sigma_{\min}(I - L \otimes_s L)}. \quad (\text{A.1})$$

*Proof.* By the Bellman equation (2.3), we have the identity:

$$\Phi q = c + (\Xi - F)q$$

By the definition of  $\hat{q}$ , we have the identity:

$$\Phi \hat{q} = P_\Phi (c + (\Psi_+ - F)\hat{q}),$$

where  $P_\Phi = \Phi(\Phi^\top \Phi)^{-1} \Phi^\top$  is the orthogonal projector onto the columns of  $\Phi$ . Combining these two identities gives us:

$$P_\Phi (\Phi - \Xi + F)(q - \hat{q}) = P_\Phi (\Xi - \Psi_+) \hat{q}.$$

Next, the  $i$ -th row of  $\Phi - \Xi + F$  is:

$$\begin{aligned} & \text{svec} \left( \begin{bmatrix} x_i \\ u_i \end{bmatrix} \begin{bmatrix} x_i \\ u_i \end{bmatrix}^\top - \mathbb{E} \left[ \begin{bmatrix} I \\ K_{\text{eval}} \end{bmatrix} \tilde{x} \tilde{x}^\top \begin{bmatrix} I \\ K_{\text{eval}} \end{bmatrix}^\top \mid x_i, u_i \right] + \sigma_w^2 \begin{bmatrix} I \\ K_{\text{eval}} \end{bmatrix} \begin{bmatrix} I \\ K_{\text{eval}} \end{bmatrix}^\top \right) \\ &= \text{svec} \left( \begin{bmatrix} x_i \\ u_i \end{bmatrix} \begin{bmatrix} x_i \\ u_i \end{bmatrix}^\top - L \begin{bmatrix} x_i \\ u_i \end{bmatrix} \begin{bmatrix} x_i \\ u_i \end{bmatrix}^\top L^\top \right) \\ &= (I - L \otimes_s L) \phi(x_i, u_i), \end{aligned}$$

where  $\tilde{x} = Ax_i + Bu_i + w_i$ . Therefore,  $\Phi - \Xi + F = \Phi(I - L \otimes_s L)^\top$ . Combining with the above identity:

$$\Phi(I - L \otimes_s L)^\top (q - \hat{q}) = P_\Phi(\Xi - \Psi_+) \hat{q}.$$

Because  $\Phi$  has full column rank, this identity implies that:

$$(I - L \otimes_s L)^\top (q - \hat{q}) = (\Phi^\top \Phi)^{-1} \Phi^\top (\Xi - \Psi_+) \hat{q}.$$

Using the inequalities:

$$\begin{aligned} \|(I - L \otimes_s L)^\top (q - \hat{q})\| &\geq \sigma_{\min}((I - L \otimes_s L)) \|q - \hat{q}\|, \\ (\Phi^\top \Phi)^{-1} \Phi^\top (\Xi - \Psi_+) \hat{q} &\leq \frac{\|(\Phi^\top \Phi)^{-1/2} \Phi^\top (\Xi - \Psi_+) \hat{q}\|}{\lambda_{\min}((\Phi^\top \Phi)^{-1/2})} = \frac{\|(\Phi^\top \Phi)^{-1/2} \Phi^\top (\Xi - \Psi_+) \hat{q}\|}{\sigma_{\min}(\Phi)}, \end{aligned}$$

we obtain:

$$\|q - \hat{q}\| \leq \frac{\|(\Phi^\top \Phi)^{-1/2} \Phi^\top (\Xi - \Psi_+) \hat{q}\|}{\sigma_{\min}(\Phi) \sigma_{\min}(I - L \otimes_s L)}.$$

Next, let  $\Delta = q - \hat{q}$ . By triangle inequality:

$$\|\Delta\| \leq \frac{\|(\Phi^\top \Phi)^{-1/2} \Phi^\top (\Xi - \Psi_+) \hat{q}\|}{\sigma_{\min}(\Phi) \sigma_{\min}(I - L \otimes_s L)} + \frac{\|(\Phi^\top \Phi)^{-1/2} \Phi^\top (\Xi - \Psi_+) q\|}{\sigma_{\min}(\Phi) \sigma_{\min}(I - L \otimes_s L)}.$$

The claim now follows.  $\square$

In order to apply Lemma A.1, we first bound the minimum singular value  $\sigma_{\min}(\Phi)$ . We do this using the small-ball argument of Simchowitz et al. [33].

**Definition 2** (Definition 2.1, [33]). *Let  $\{Z_t\}$  be a real-valued stochastic process that is adapted to  $\{\mathcal{F}_t\}$ . The process  $\{Z_t\}$  satisfies the  $(k, \nu, p)$  block martingale small-ball (BMSB) condition if for any  $j \geq 0$  we have that:*

$$\frac{1}{k} \sum_{i=1}^k \mathbb{P}(|Z_{j+i}| \geq \nu | \mathcal{F}_j) \geq p \text{ a.s.}$$

With the block martingale small-ball definition in place, we now show that the process  $\langle \phi_t, y \rangle$  satisfies this condition for any fixed unit vector  $y$ .

**Proposition A.2.** *Given an arbitrary vector  $y \in \mathcal{S}^{n+d-1}$ , define the process  $Z_t := \langle \phi_t, y \rangle$ , the filtration  $\mathcal{F}_t := \sigma(\{u_i, w_{i-1}\}_{i=0}^t)$ , and matrix  $C := \begin{bmatrix} I & 0 \\ K_{\text{play}} & I \end{bmatrix} \begin{bmatrix} \sigma_w I & 0 \\ 0 & \sigma_\eta I \end{bmatrix}$ . Then  $(Z_t)_{t \geq 1}$  satisfies the  $(1, \sigma_{\min}^2(C), 1/324)$  block martingale small-ball (BMSB) condition from Definition 2. That is, almost surely, we have:*

$$\mathbb{P}(|Z_{t+1}| \geq \sigma_{\min}^2(C) | \mathcal{F}_t) \geq 1/324.$$

*Proof.* Let  $Y := \text{smat}(y)$  and  $\mu_t := Ax_t + Bu_t$ . We have that:

$$\begin{bmatrix} x_{t+1} \\ u_{t+1} \end{bmatrix} = \begin{bmatrix} I \\ K_{\text{play}} \end{bmatrix} \mu_t + \begin{bmatrix} I & 0 \\ K_{\text{play}} & I \end{bmatrix} \begin{bmatrix} w_t \\ \eta_{t+1} \end{bmatrix}.$$

Therefore:

$$\begin{aligned}\langle \phi_{t+1}, y \rangle &= \begin{bmatrix} x_{t+1} \\ u_{t+1} \end{bmatrix}^\top Y \begin{bmatrix} x_{t+1} \\ u_{t+1} \end{bmatrix} \\ &= \left( \begin{bmatrix} I \\ K_{\text{play}} \end{bmatrix} \mu_t + \begin{bmatrix} I & 0 \\ K_{\text{play}} & I \end{bmatrix} \begin{bmatrix} w_t \\ \eta_{t+1} \end{bmatrix} \right)^\top Y \left( \begin{bmatrix} I \\ K_{\text{play}} \end{bmatrix} \mu_t + \begin{bmatrix} I & 0 \\ K_{\text{play}} & I \end{bmatrix} \begin{bmatrix} w_t \\ \eta_{t+1} \end{bmatrix} \right),\end{aligned}$$

which is clearly a Gaussian polynomial of degree 2 given  $\mathcal{F}_t$ . Hence by Gaussian hyper-contractivity results (see e.g. [? ]), we have that almost surely:

$$\mathbb{E}[|Z_{t+1}|^4 | \mathcal{F}_t] \leq 81 \mathbb{E}[|Z_{t+1}|^2 | \mathcal{F}_t]^2.$$

Hence we can invoke the Paley-Zygmund inequality to conclude that for any  $\theta \in (0, 1)$ , almost surely we have:

$$\mathbb{P}(|Z_{t+1}| \geq \sqrt{\theta \mathbb{E}[|Z_{t+1}|^2 | \mathcal{F}_t]} | \mathcal{F}_t) \geq (1 - \theta)^2 \frac{\mathbb{E}[|Z_{t+1}|^2 | \mathcal{F}_t]^2}{\mathbb{E}[|Z_{t+1}|^4 | \mathcal{F}_t]} \geq \frac{(1 - \theta)^2}{81}.$$

We now state an useful proposition.

**Proposition A.3.** *Let  $\mu, C, Y$  be fixed and  $g \sim \mathcal{N}(0, I)$ . We have that:*

$$\mathbb{E}[(\mu + Cg)^\top Y (\mu + Cg)]^2 \geq 2 \|C^\top Y C\|_F^2.$$

*Proof.* Let  $Z := (\mu + Cg)^\top Y (\mu + Cg)$ . We know that  $\mathbb{E}[Z^2] \geq \mathbb{E}[(Z - \mathbb{E}[Z])^2]$ . A quick computation yields that  $\mathbb{E}[Z] = \mu^\top Y \mu + \text{tr}(C^\top Y C)$ . Hence

$$Z - \mathbb{E}[Z] = g^\top C^\top Y C g - \text{tr}(C^\top Y C) + 2\mu^\top Y C g.$$

Therefore,

$$\mathbb{E}[(Z - \mathbb{E}[Z])^2] \geq \mathbb{E}[(g^\top C^\top Y C g - \text{tr}(C^\top Y C))^2] = 2 \|C^\top Y C\|_F^2.$$

□

Invoking Proposition A.3 and using basic properties of the Kronecker product, we have that:

$$\mathbb{E}[Z_{t+1}^2 | \mathcal{F}_t] \geq 2 \|C^\top Y C\|_F^2 = 2 \|(C^\top \otimes C^\top) y\|^2 \geq 2 \sigma_{\min}^2(C^\top \otimes C^\top) = 2 \sigma_{\min}^4(C).$$

The claim now follows by setting  $\theta = 1/2$ .

□

With the BMSB bound in place, we can now utilize Proposition 2.5 of Simchowicz et al. [33] to obtain the following lower bound on the minimum singular value  $\sigma_{\min}(\Phi)$ .

**Proposition A.4.** *Fix  $\delta \in (0, 1)$ . Suppose that  $\sigma_\eta \leq \sigma_w$ , and that  $T$  exceeds:*

$$T \geq 324^2 \cdot 8 \left( (n + d)^2 \log \left( 1 + \frac{20736\sqrt{3}}{\sqrt{\delta}} \frac{(1 + \|K_{\text{play}}\|^2)^2 (\tau^2 \rho^2 n \|\Sigma_0\| + \text{tr}(P_\infty))}{\sigma_\eta^2} \right) + \log(2/\delta) \right). \quad (\text{A.2})$$

*Suppose also that  $A + BK_{\text{play}}$  is  $(\tau, \rho)$ -stable. Then we have with probability at least  $1 - \delta$ ,*

$$\sigma_{\min}(\Phi) \geq \frac{\sigma_\eta^2}{1296\sqrt{8}} \frac{1}{1 + \|K_{\text{play}}\|^2} \sqrt{T}.$$

*We also have with probability at least  $1 - \delta$ ,*

$$\|\Phi^\top \Phi\| \leq \frac{12T}{\delta} (1 + \|K_{\text{play}}\|^2)^2 (\tau^2 \rho^2 n \|\Sigma_0\| + \text{tr}(P_\infty))^2.$$



*Proof.* We first compute a crude upper bound on  $\|\Phi\|$  using Markov's inequality:

$$\mathbb{P}(\|\Phi\|^2 \geq t^2) = \frac{\mathbb{E}[\lambda_{\max}(\Phi^\top \Phi)]}{t^2} \leq \frac{\text{tr}(\mathbb{E}[\Phi^\top \Phi])}{t^2}.$$

Now we upper bound  $\mathbb{E}[\|\phi_t\|^2]$ . Letting  $z_t = (x_t, u_t)$ , we have that  $\mathbb{E}[\|\phi_t\|^2] = \mathbb{E}[\|z_t\|^4] \leq 3(\mathbb{E}[\|z_t\|^2])^2$ . We now bound  $\mathbb{E}[\|z_t\|^2] \leq (1 + \|K_{\text{play}}\|^2) \text{tr}(\Sigma_t) + \sigma_\eta^2 d$ , and therefore:

$$\begin{aligned} \sqrt{\mathbb{E}[\|\phi_t\|^2]} &\leq \sqrt{3}((1 + \|K_{\text{play}}\|^2) \text{tr}(\Sigma_t) + \sigma_\eta^2 d) \\ &\leq \sqrt{3}((1 + \|K_{\text{play}}\|^2)(\tau^2 \rho^2 n \|\Sigma_0\| + \text{tr}(P_\infty)) + \sigma_\eta^2 d) \\ &\leq 2\sqrt{3}(1 + \|K_{\text{play}}\|^2)(\tau^2 \rho^2 n \|\Sigma_0\| + \text{tr}(P_\infty)). \end{aligned}$$

Above, the last inequality holds because  $\sigma_\eta^2 d \leq \sigma_w^2 n \leq \text{tr}(P_\infty)$ . Therefore, we have from Markov's inequality:

$$\mathbb{P}\left(\|\Phi\| \geq \frac{\sqrt{T}}{\sqrt{\delta}} 2\sqrt{3}(1 + \|K_{\text{play}}\|^2)(\tau^2 \rho^2 n \|\Sigma_0\| + \text{tr}(P_\infty))\right) \leq \delta.$$

Fix an  $\varepsilon > 0$ , and let  $\mathcal{N}(\varepsilon)$  denote an  $\varepsilon$ -net of the unit sphere  $\mathcal{S}^{(n+d)(n+d+1)/2-1}$ . Next, by Proposition 2.5 of Simchowitz et al. [33] and a union bound over  $\mathcal{N}(\varepsilon)$ :

$$\mathbb{P}\left(\min_{v \in \mathcal{N}(\varepsilon)} \|\Phi v\| \geq \frac{\sigma_{\min}^2(C)}{324\sqrt{8}} \sqrt{T}\right) \geq 1 - (1 + 2/\varepsilon)^{(n+d)^2} e^{-\frac{T}{324^2 \cdot 8}}.$$

Now set

$$\varepsilon = \frac{\sqrt{\delta}}{5184\sqrt{3}} \frac{\sigma_{\min}^2(C)}{(1 + \|K_{\text{play}}\|^2)(\tau^2 \rho^2 n \|\Sigma_0\| + \text{tr}(P_\infty))},$$

and observe that as long as  $T$  exceeds:

$$T \geq 324^2 \cdot 8 \left( (n+d)^2 \log \left( 1 + \frac{10368\sqrt{3}}{\sqrt{\delta}} \frac{(1 + \|K_{\text{play}}\|^2)(\tau^2 \rho^2 n \|\Sigma_0\| + \text{tr}(P_\infty))}{\sigma_{\min}^2(C)} \right) + \log(2/\delta) \right),$$

we have that  $\mathbb{P}\left(\min_{v \in \mathcal{N}(\varepsilon)} \|\Phi v\| \geq \frac{\sigma_{\min}^2(C)}{324\sqrt{8}} \sqrt{T}\right) \geq 1 - \delta/2$ . To conclude, observe that:

$$\sigma_{\min}(\Phi) = \inf_{\|v\|=1} \|\Phi v\| \geq \min_{v \in \mathcal{N}(\varepsilon)} \|\Phi v\| - \|\Phi\| \varepsilon,$$

and union bound over the two events. To conclude the proof, note that Lemma F.6 in Dean et al. [13] yields that  $\sigma_{\min}^2(C) \geq \frac{\sigma_\eta^2}{2} \frac{1}{1 + \|K_{\text{play}}\|^2}$  since  $\sigma_\eta \leq \sigma_w$ .  $\square$

We now turn our attention to upper bounding the self-normalized martingale terms:

$$\|(\Phi^\top \Phi)^{-1} \Phi^\top (\Xi - \Psi_+)\| \text{ and } \|(\Phi^\top \Phi)^{-1} \Phi^\top (\Xi - \Psi_+) q\|.$$

Our main tool here will be the self-normalized tail bounds of Abbasi-Yadkori et al. [2].

**Lemma A.5** (Corollary 1, [2]). *Let  $\{\mathcal{F}_t\}$  be a filtration. Let  $\{x_t\}$  be a  $\mathbb{R}^{d_1}$  process that is adapted to  $\{\mathcal{F}_t\}$  and let  $\{w_t\}$  be a  $\mathbb{R}^{d_2}$  martingale difference sequence that is adapted to  $\{\mathcal{F}_t\}$ . Let  $V$  be a fixed positive definite  $d_1 \times d_1$  matrix and define:*

$$\bar{V}_t = V + \sum_{s=1}^t x_s x_s^\top, \quad S_t = \sum_{s=1}^t x_s w_{s+1}^\top.$$

(a) Suppose for any fixed unit  $h \in \mathbb{R}^{d_2}$  we have that  $\langle w_t, h \rangle$  is conditionally  $R$ -sub-Gaussian, that is:

$$\forall \lambda \in \mathbb{R}, t \geq 1, \quad \mathbb{E}[e^{\lambda \langle w_{t+1}, h \rangle} | \mathcal{F}_t] \leq e^{\frac{\lambda^2 R^2}{2}}.$$

We have that with probability at least  $1 - \delta$ , for all  $t \geq 1$ ,

$$\|\bar{V}_t^{-1/2} S_t\|^2 \leq 8R^2 \left( d_2 \log 5 + \log \left( \frac{\det(\bar{V}_t)^{1/2} \det(V)^{-1/2}}{\delta} \right) \right).$$

(b) Now suppose that  $\bar{\delta}$  satisfies the condition:

$$\sum_{s=2}^{T+1} \mathbb{P}(\|w_s\| > R) \leq \bar{\delta}.$$

Then with probability at least  $1 - \delta - \bar{\delta}$ , for all  $1 \leq t \leq T$ ,

$$\|\bar{V}_t^{-1/2} S_t\|^2 \leq 32R^2 \left( d_2 \log 5 + \log \left( \frac{\det(\bar{V}_t)^{1/2} \det(V)^{-1/2}}{\delta} \right) \right).$$

*Proof.* Fix a unit  $h \in \mathbb{R}^{d_2}$ . By Corollary 1 of Abbasi-Yadkori et al. [2], we have with probability at least  $1 - \delta$ ,

$$\|\bar{V}_t^{-1/2} S_t h\|^2 \leq 2R^2 \log \left( \frac{\det(\bar{V}_t)^{1/2} \det(V)^{-1/2}}{\delta} \right), \quad 1 \leq t \leq T.$$

A standard covering argument yields that:

$$\|\bar{V}_t^{-1/2} S_t\|^2 \leq 4 \max_{h \in \mathcal{N}(1/2)} \|\bar{V}_t^{-1/2} S_t h\|^2.$$

Union bounding over  $\mathcal{N}(1/2)$ , we obtain that:

$$\begin{aligned} \|\bar{V}_t^{-1/2} S_t\|^2 &\leq 8R^2 \log \left( 5^{d_2} \frac{\det(\bar{V}_t)^{1/2} \det(V)^{-1/2}}{\delta} \right) \\ &= 8R^2 \left( d_2 \log 5 + \log \left( \frac{\det(\bar{V}_t)^{1/2} \det(V)^{-1/2}}{\delta} \right) \right). \end{aligned}$$

This yields (a).

For (b), we use a simple stopping time argument to handle truncation. Define the stopping time  $\tau := \inf\{t \geq 1 : \|w_t\| > R\}$  and the truncated process  $\tilde{w}_t := w_t \mathbf{1}_{\tau \geq t}$ . Because  $\tau$  is a stopping time, this truncated process  $\{\tilde{w}_t\}$  remains a martingale difference sequence. Define  $Z_t = \sum_{s=1}^t x_s \tilde{w}_{s+1}^\top$ . For any  $\ell > 0$  we observe that:

$$\begin{aligned} &\mathbb{P}(\exists 1 \leq t \leq T : \|\bar{V}_t^{-1/2} S_t\| > \ell) \\ &\leq \mathbb{P}(\{\exists 1 \leq t \leq T : \|\bar{V}_t^{-1/2} S_t\| > \ell\} \cap \{\tau > T+1\}) + \mathbb{P}(\tau \leq T+1) \\ &= \mathbb{P}(\{\exists 1 \leq t \leq T : \|\bar{V}_t^{-1/2} Z_t\| > \ell\} \cap \{\tau > T+1\}) + \mathbb{P}(\tau \leq T+1) \\ &\leq \mathbb{P}(\exists t \geq 1 : \|\bar{V}_t^{-1/2} Z_t\| > \ell) + \mathbb{P}(\tau \leq T+1) \\ &\leq \mathbb{P}(\exists t \geq 1 : \|\bar{V}_t^{-1/2} Z_t\| > \ell) + \sum_{s=2}^{T+1} \mathbb{P}(\|w_s\| > R) \\ &\leq \mathbb{P}(\exists t \geq 1 : \|\bar{V}_t^{-1/2} Z_t\| > \ell) + \bar{\delta}. \end{aligned}$$

Now set  $\ell = 32R^2 \left( d_2 \log 5 + \log \left( \frac{\det(\bar{V}_t)^{1/2} \det(V)^{-1/2}}{\delta} \right) \right)$  and using the fact that a  $R$  bounded random variable is  $2R$ -sub-Gaussian, the claim now follows by another application of Corollary 1 from [2].  $\square$

With Lemma A.5 in place, we are ready to bound the martingale difference terms.

**Proposition A.6.** Suppose the hypothesis of Proposition A.4 hold. With probability at least  $1 - \delta$ ,

$$\begin{aligned} \|(\Phi^\top \Phi)^{-1/2} \Phi^\top (\Xi - \Psi_+) q\| &\leq (n+d) \sigma_w \sqrt{\tau^2 \rho^4 \|\Sigma_0\| + \|P_\infty\| + \sigma_\eta^2 \|B\|^2 (1 + \|K_{\text{eval}}\|^2)} \|Q\|_F \\ &\quad \times \text{polylog}(n, \tau, \|\Sigma_0\|, \|P_\infty\|, \|K_{\text{play}}\|, T/\delta, 1/\sigma_\eta), \\ \|(\Phi^\top \Phi)^{-1/2} \Phi^\top (\Xi - \Psi_+)\| &\leq (n+d)^2 \sigma_w \sqrt{\tau^2 \rho^4 \|\Sigma_0\| + \|P_\infty\| + \sigma_\eta^2 \|B\|^2 (1 + \|K_{\text{eval}}\|^2)} \\ &\quad \times \text{polylog}(n, \tau, \|\Sigma_0\|, \|P_\infty\|, \|K_{\text{play}}\|, T/\delta, 1/\sigma_\eta). \end{aligned}$$

*Proof.* For the proof, constants  $c, c_i$  will denote universal constants. Define two matrices:

$$\begin{aligned} V_1 &:= c_1 \frac{\sigma_\eta^4}{(1 + \|K_{\text{play}}\|^2)^2} T \cdot I, \\ V_2 &:= c_2 \frac{T}{\delta} (1 + \|K_{\text{play}}\|^2)^2 (\tau^2 \rho^2 n \|\Sigma_0\| + \text{tr}(P_\infty))^2 \cdot I. \end{aligned}$$

By Proposition A.4, with probability at least  $1 - \delta/2$ , we have that:

$$V_1 \preceq \Phi^\top \Phi \preceq V_2.$$

Call this event  $\mathcal{E}_1$ .

Next, we have:

$$\begin{aligned} &\mathbb{E}[x_{t+1} x_{t+1}^\top | x_t, u_t] - x_{t+1} x_{t+1}^\top \\ &= \mathbb{E}[(Ax_t + Bu_t + w_t)(Ax_t + Bu_t + w_t)^\top | x_t, u_t] - (Ax_t + Bu_t + w_t)(Ax_t + Bu_t + w_t)^\top \\ &= (Ax_t + Bu_t)(Ax_t + Bu_t)^\top + \sigma_w^2 I \\ &\quad - (Ax_t + Bu_t)(Ax_t + Bu_t)^\top - (Ax_t + Bu_t)w_t^\top - w_t(Ax_t + Bu_t)^\top - w_t w_t^\top \\ &= \sigma_w^2 I - w_t w_t^\top - (Ax_t + Bu_t)w_t^\top - w_t(Ax_t + Bu_t)^\top. \end{aligned}$$

Therefore,

$$\begin{aligned} &\mathbb{E}[\psi_{t+1} | x_t, u_t] - \psi_{t+1} \\ &= \text{svec} \left( \begin{bmatrix} I \\ K_{\text{eval}} \end{bmatrix} (\sigma_w^2 I - w_t w_t^\top - (Ax_t + Bu_t)w_t^\top - w_t(Ax_t + Bu_t)^\top) \begin{bmatrix} I \\ K_{\text{eval}} \end{bmatrix}^\top \right). \end{aligned}$$

Taking the inner product of this term with  $q$ ,

$$\begin{aligned} &(\mathbb{E}[\psi_{t+1} | x_t, u_t] - \psi_{t+1})^\top q \\ &= \text{tr} \left( (\sigma_w^2 I - w_t w_t^\top - (Ax_t + Bu_t)w_t^\top - w_t(Ax_t + Bu_t)^\top) \begin{bmatrix} I \\ K_{\text{eval}} \end{bmatrix}^\top Q \begin{bmatrix} I \\ K_{\text{eval}} \end{bmatrix} \right) \\ &= \text{tr} \left( (\sigma_w^2 I - w_t w_t^\top) \begin{bmatrix} I \\ K_{\text{eval}} \end{bmatrix}^\top Q \begin{bmatrix} I \\ K_{\text{eval}} \end{bmatrix} \right) - 2w_t^\top \begin{bmatrix} I \\ K_{\text{eval}} \end{bmatrix}^\top Q \begin{bmatrix} I \\ K_{\text{eval}} \end{bmatrix} (Ax_t + Bu_t). \end{aligned}$$

By the Hanson-Wright inequality (see e.g. ? ), with probability at least  $1 - \delta/T$ ,

$$\left| \text{tr} \left( (\sigma_w^2 I - w_t w_t^\top) \begin{bmatrix} I \\ K_{\text{eval}} \end{bmatrix}^\top Q \begin{bmatrix} I \\ K_{\text{eval}} \end{bmatrix} \right) \right| \leq c_1 \sigma_w^2 (1 + \|K_{\text{eval}}\|^2) \|Q\|_F \log(T/\delta).$$

Now, let  $L_{\text{play}} := A + BK_{\text{play}}$ . By Proposition 4.7 in Tu and Recht [34], with probability at least  $1 - \delta/T$ ,

$$\begin{aligned} &\left| w_t^\top \begin{bmatrix} I \\ K_{\text{eval}} \end{bmatrix}^\top Q \begin{bmatrix} I \\ K_{\text{eval}} \end{bmatrix} (Ax_t + Bu_t) \right| \\ &\leq c_1 \sigma_w (1 + \|K_{\text{eval}}\|^2) \sqrt{\|L_{\text{play}}^{t+1} \Sigma_0 (L_{\text{play}}^{t+1})^\top\| + \|L_{\text{play}} P_t L_{\text{play}}^\top\| + \sigma_\eta^2 \|B\|^2} \|Q\|_F \log(T/\delta) \\ &\leq c_1 \sigma_w (1 + \|K_{\text{eval}}\|^2) \sqrt{\tau^2 \rho^{2(t+1)} \|\Sigma_0\| + \|P_\infty\| + \sigma_\eta^2 \|B\|^2} \|Q\|_F \log(T/\delta), \end{aligned}$$

where the inequality above comes from  $P_t \preceq P_\infty$  and  $L_{\text{play}} P_\infty L_{\text{play}}^\top \preceq P_\infty$ . Therefore, we have:

$$\begin{aligned} &|(\mathbb{E}[\psi_{t+1} | x_t, u_t] - \psi_{t+1})^\top v| \\ &\leq c_2 (\sigma_w^2 + \sigma_w \sqrt{\tau^2 \rho^{2(t+1)} \|\Sigma_0\| + \|P_\infty\| + \sigma_\eta^2 \|B\|^2}) (1 + \|K_{\text{eval}}\|^2) \|Q\|_F \log(T/\delta) \\ &\leq c_3 \sigma_w \sqrt{\tau^2 \rho^{2(t+1)} \|\Sigma_0\| + \|P_\infty\| + \sigma_\eta^2 \|B\|^2} (1 + \|K_{\text{eval}}\|^2) \|Q\|_F \log(T/\delta). \end{aligned}$$

The last inequality holds because  $P_\infty \succeq \sigma_w^2 I$  and hence  $\sigma_w \leq \|P_\infty\|^{1/2}$ . Therefore we can set

$$R = c_3 \sigma_w \sqrt{\tau^2 \rho^4 \|\Sigma_0\| + \|P_\infty\| + \sigma_\eta^2 \|B\|^2 (1 + \|K_{\text{eval}}\|^2) \|Q\|_F \log(T/\delta)},$$

and invoke Lemma A.5 to conclude that with probability at least  $1 - \delta/2$ ,

$$\|(V_1 + \Phi^\top \Phi)^{-1/2} \Phi^\top (\Xi - \Psi_+) v\| \leq c_4 (n + d) R + c_5 R \sqrt{\log(\det((V_1 + \Phi^\top \Phi) V_1^{-1})^{1/2} / \delta)}.$$

Call this event  $\mathcal{E}_2$ .

For the remainder of the proof we work on  $\mathcal{E}_1 \cap \mathcal{E}_2$ , which has probability at least  $1 - \delta$ . Since  $\Phi^\top \Phi \succeq V_1$ , we have that  $(\Phi^\top \Phi)^{-1} \leq 2(V_1 + \Phi^\top \Phi)^{-1}$ . Therefore, by another application of Lemma A.5:

$$\begin{aligned} & \|(\Phi^\top \Phi)^{-1/2} \Phi^\top (\Xi - \Psi_+)\| \\ & \leq \sqrt{2} \|(V_1 + \Phi^\top \Phi)^{-1/2} \Phi^\top (\Xi - \Psi_+)\| \\ & \leq c_6 (n + d) R + c_7 R \sqrt{\log(\det((V_1 + \Phi^\top \Phi) V_1^{-1})^{1/2} / \delta)} \\ & \leq c_6 (n + d) R + c_7 R \sqrt{\log(\det((V_1 + V_2) V_1^{-1})^{1/2} / \delta)} \\ & \leq c_6 (n + d) R + c_8 R (n + d) \sqrt{\log \left( \frac{(1 + \|K_{\text{play}}\|^2)^4 (\tau^2 \rho^2 n \|\Sigma_0\| + \text{tr}(P_\infty))^2}{\delta \sigma_\eta^4} \right)} \\ & \leq c(n + d) R \text{polylog}(n, \tau, \|\Sigma_0\|, \|P_\infty\|, \|K_{\text{play}}\|, 1/\delta, 1/\sigma_\eta). \end{aligned}$$

Next, we bound:

$$\begin{aligned} & \|\mathbb{E}[\psi_{t+1}|x_t, u_t] - \psi_{t+1}\| \\ & \leq \left\| \begin{bmatrix} I \\ K_{\text{eval}} \end{bmatrix} (\sigma_w^2 I - w_t w_t^\top) \begin{bmatrix} I \\ K_{\text{eval}} \end{bmatrix}^\top \right\|_F + \left\| \begin{bmatrix} I \\ K_{\text{eval}} \end{bmatrix} w_t (Ax_t + Bu_t)^\top \begin{bmatrix} I \\ K_{\text{eval}} \end{bmatrix}^\top \right\|_F \\ & \leq (1 + \|K_{\text{eval}}\|^2) (\|\sigma_w^2 I - w_t w_t^\top\|_F + \|w_t (Ax_t + Bu_t)^\top\|_F). \end{aligned}$$

Now, by standard Gaussian concentration results, with probability  $1 - \delta/T$ ,

$$\|\sigma_w^2 I - w_t w_t^\top\|_F \leq c \sigma_w^2 (n + \log(T/\delta)),$$

and also

$$\begin{aligned} & \|w_t (Ax_t + Bu_t)^\top\|_F \\ & \leq c \sigma_w (\sqrt{n} + \sqrt{\log(T/\delta)}) (\sqrt{\text{tr}(L_{\text{play}}^{t+1} \Sigma_0 (L_{\text{play}}^{t+1})^\top) + \text{tr}(L_{\text{play}} P_t L_{\text{play}}^\top) + \sigma_\eta^2 \|B\|_F^2} \\ & \quad + \sqrt{\|L_{\text{play}}^{t+1} \Sigma_0 (L_{\text{play}}^{t+1})^\top\| + \|L_{\text{play}} P_t L_{\text{play}}^\top\| + \sigma_\eta^2 \|B\|^2 \sqrt{\log(T/\delta)}}) \\ & \leq c \sigma_w (n + d) \sqrt{\tau^2 \rho^4 \|\Sigma_0\| + \|P_\infty\| + \sigma_\eta^2 \|B\| \log(T/\delta)}. \end{aligned}$$

Therefore, with probability  $1 - \delta/T$ ,

$$\begin{aligned} & \|\mathbb{E}[\psi_{t+1}|x_t, u_t] - \psi_{t+1}\| \\ & \leq c(1 + \|K_{\text{eval}}\|^2)(n + d) \sigma_w \sqrt{\tau^2 \rho^4 \|\Sigma_0\| + \|P_\infty\| + \sigma_\eta^2 \|B\|^2 \log(T/\delta)}. \end{aligned}$$

□

We are now in a position to prove Theorem 2.1. We first observe that we can lower bound  $\sigma_{\min}(I - L \otimes_s L)$  using the  $(\tau, \rho)$ -stability of  $A + BK_{\text{eval}}$ . This is because for  $k \geq 1$ ,

$$\begin{aligned} \|L^k\| &= \left\| \begin{bmatrix} I \\ K_{\text{eval}} \end{bmatrix} (A + BK_{\text{eval}})^{k-1} \begin{bmatrix} A & B \end{bmatrix} \right\| \\ &\leq 2 \|K_{\text{eval}}\|_+ \|[A \ B]\| \tau \rho^{k-1} \\ &\leq \frac{2 \|K_{\text{eval}}\|_+ \max\{1, \sqrt{\|A\|^2 + \|B\|^2}\}}{\rho} \tau \cdot \rho^k. \end{aligned}$$

Hence we see that  $L$  is  $(\frac{2\|K_{\text{eval}}\|_+ \max\{1, \sqrt{\|A\|^2 + \|B\|^2}\}}{\rho} \tau, \rho)$ -stable. Next, we know that  $\sigma_{\min}(I - L \otimes_s L) = \frac{1}{\|(I - L \otimes_s L)^{-1}\|}$ . Therefore, for any unit norm  $v$ ,

$$\begin{aligned} \|(I - L \otimes_s L)^{-1}v\| &= \|(I - L \otimes_s L)^{-1} \text{svec}(\text{smat}(v))\| = \|\text{dlyap}(L^\top, \text{smat}(v))\|_F \\ &\leq \frac{4\|K_{\text{eval}}\|_+^2 (\|A\|^2 + \|B\|^2)_+ \tau^2}{\rho^2(1 - \rho^2)}. \end{aligned}$$

Here, the last inequality uses Proposition E.5. Hence we have the bound:

$$\sigma_{\min}(I - L \otimes_s L) \geq \frac{\rho^2(1 - \rho^2)}{4\|K_{\text{eval}}\|_+^2 (\|A\|^2 + \|B\|^2)_+ \tau^2}.$$

By Proposition A.4, as long as  $T \geq \tilde{O}(1)(n + d)^2$  with probability at least  $1 - \delta/2$ :

$$\sigma_{\min}(\Phi) \geq c \frac{\sigma_\eta^2}{\|K_{\text{play}}\|_+^2} \sqrt{T}.$$

By Proposition A.6, with probability at least  $1 - \delta/2$ :

$$\begin{aligned} \|(\Phi^\top \Phi)^{-1/2} \Phi^\top (\Xi - \Psi_+) q\| &\leq (n + d) \sigma_w \sqrt{\tau^2 \rho^4 \|\Sigma_0\| + \|P_\infty\| + \sigma_\eta^2 \|B\|^2} \|K_{\text{eval}}\|_+^2 \|Q^{K_{\text{eval}}}\|_F \tilde{O}(1), \\ \|(\Phi^\top \Phi)^{-1/2} \Phi^\top (\Xi - \Psi_+)\| &\leq (n + d)^2 \sigma_w \sqrt{\tau^2 \rho^4 \|\Sigma_0\| + \|P_\infty\| + \sigma_\eta^2 \|B\|^2} \|K_{\text{eval}}\|_+^2 \tilde{O}(1). \end{aligned}$$

We first check the condition

$$\frac{\|(\Phi^\top \Phi)^{-1/2} \Phi^\top (\Xi - \Psi_+)\|}{\sigma_{\min}(\Phi) \sigma_{\min}(I - L \otimes_s L)} \leq 1/2,$$

from Lemma A.1. A sufficient condition is that  $T$  satisfies:

$$\begin{aligned} T &\geq \tilde{O}(1) \frac{\|K_{\text{play}}\|_+^4}{\sigma_\eta^4} \cdot (n + d)^4 \sigma_w^2 (\tau^2 \rho^4 \|\Sigma_0\| + \|P_\infty\| + \sigma_\eta^2 \|B\|^2) \\ &\quad \times \|K_{\text{eval}}\|_+^4 \cdot \frac{\|K_{\text{eval}}\|_+^4 (\|A\|^2 + \|B\|^2)_+ \tau^4}{\rho^4(1 - \rho^2)^2} \\ &= \tilde{O}(1) \frac{\tau^4}{\rho^4(1 - \rho^2)^2} \frac{(n + d)^4}{\sigma_\eta^4} \sigma_w^2 (\tau^2 \rho^4 \|\Sigma_0\| + \|P_\infty\| + \sigma_\eta^2 \|B\|^2) \\ &\quad \times \|K_{\text{play}}\|_+^4 \|K_{\text{eval}}\|_+^8 (\|A\|^4 + \|B\|^4)_+. \end{aligned}$$

Once this condition on  $T$  is satisfied, then we have that the error  $\|\hat{q} - q\|$  is bounded by:

$$\begin{aligned} &\tilde{O}(1) \frac{\|K_{\text{play}}\|_+^2}{\sigma_\eta^2 \sqrt{T}} \cdot (n + d) \sigma_w \sqrt{\tau^2 \rho^4 \|\Sigma_0\| + \|P_\infty\| + \sigma_\eta^2 \|B\|^2} \\ &\quad \times \|K_{\text{eval}}\|_+^2 \|Q^{K_{\text{eval}}}\|_F \cdot \frac{\|K_{\text{eval}}\|_+^2 (\|A\|^2 + \|B\|^2)_+ \tau^2}{\rho^2(1 - \rho^2)} \\ &= \tilde{O}(1) \frac{\tau^2}{\rho^2(1 - \rho^2)} \frac{(n + d)}{\sigma_\eta^2 \sqrt{T}} \sigma_w \sqrt{\tau^2 \rho^4 \|\Sigma_0\| + \|P_\infty\| + \sigma_\eta^2 \|B\|^2} \\ &\quad \times \|K_{\text{play}}\|_+^2 \|K_{\text{eval}}\|_+^4 (\|A\|^2 + \|B\|^2)_+ \|Q^{K_{\text{eval}}}\|_F. \end{aligned}$$

Theorem 2.1 now follows from Lemma A.1.

## B Analysis for LSPI

In this section we study the non-asymptotic behavior of LSPI. Our analysis proceeds in two steps. We first understand the behavior of exact policy iteration on LQR. Then, we study the effects of introducing errors into the policy iteration updates.

## B.1 Exact Policy Iteration

Exactly policy iteration works as follows. We start with a stabilizing controller  $K_0$  for  $(A, B)$ , and let  $V_0$  denote its associated value function. We then apply the following recursions for  $t = 0, 1, 2, \dots$ :

$$K_{t+1} = -(S + B^\top V_t B)^{-1} B^\top V_t A, \quad (\text{B.1})$$

$$V_{t+1} = \text{dlyap}(A + BK_{t+1}, S + K_{t+1}^\top R K_{t+1}). \quad (\text{B.2})$$

Note that this recurrence is related to, but different from, that of *value iteration*, which starts from a PSD  $V_0$  and recurses:

$$V_{t+1} = A^\top V_t A - A^\top V_t B (S + B^\top V_t B)^{-1} B^\top V_t A + S.$$

While the behavior of value iteration for LQR is well understood (see e.g. Lincoln and Rantzer [23] or ? ), the behavior of policy iteration is less studied. Fazel et al. [16] show that policy iteration is equivalent to the Gauss-Newton method on the objective  $J(K)$  with a specific step-size, and give a simple analysis which shows linear convergence to the optimal controller. In this section, we present an analysis of the behavior of exact policy iteration that builds on top of the fixed-point theory from Lee and Lim [22]. A key component of our analysis is the following invariant metric  $\delta_\infty$  on positive definite matrices:

$$\delta_\infty(A, B) := \|\log(A^{-1/2} B A^{-1/2})\|.$$

Various properties of  $\delta_\infty$  are reviewed in Appendix D.

Our analysis proceeds as follows. First, we note by the matrix inversion lemma:

$$S + A^\top (B R^{-1} B^\top + V^{-1})^{-1} A = S + A^\top V A - A^\top V B (R + B^\top V B)^{-1} B^\top V A =: F(V).$$

Let  $V_\star$  be the unique positive definite solution to  $V = F(V)$ . For any positive definite  $V$  we have by Lemma D.2:

$$\delta_\infty(F(V), V_\star) \leq \frac{\alpha}{\lambda_{\min}(S) + \alpha} \delta_\infty(V, V_\star), \quad (\text{B.3})$$

with  $\alpha = \max\{\lambda_{\max}(A^\top V A), \lambda_{\max}(A^\top V_\star A)\}$ . Indeed, (B.3) gives us another method to analyze value iteration, since it shows that the Riccati operator  $F(V)$  is contractive in the  $\delta_\infty$  metric. Our next result combines this contraction property with the policy iteration analysis of Bertsekas [7].

**Proposition B.1** (Policy Iteration for LQR). *Suppose that  $S, R$  are positive definite and there exists a unique positive definite solution to the discrete algebraic Riccati equation (DARE). Let  $K_0$  be a stabilizing policy for  $(A, B)$  and let  $V_0 = \text{dlyap}(A + BK_0, S + K_0^\top R K_0)$ . Consider the following sequence of updates for  $t = 0, 1, 2, \dots$ :*

$$\begin{aligned} K_{t+1} &= -(R + B^\top V_t B)^{-1} B^\top V_t A, \\ V_{t+1} &= \text{dlyap}(A + BK_{t+1}, S + K_{t+1}^\top R K_{t+1}). \end{aligned}$$

The following statements hold:

- (i)  $K_t$  stabilizes  $(A, B)$  for all  $t = 0, 1, 2, \dots$ ,
- (ii)  $V_\star \preceq V_{t+1} \preceq V_t$  for all  $t = 0, 1, 2, \dots$ ,
- (iii)  $\delta_\infty(V_{t+1}, V_\star) \leq \rho \cdot \delta_\infty(V_t, V_\star)$  for all  $t = 0, 1, 2, \dots$ , with  $\rho := \frac{\lambda_{\max}(A^\top V_0 A)}{\lambda_{\min}(S) + \lambda_{\max}(A^\top V_0 A)}$ . Consequently,  $\delta_\infty(V_t, V_\star) \leq \rho^t \cdot \delta_\infty(V_0, V_\star)$  for  $t = 0, 1, 2, \dots$

*Proof.* We first prove (i) and (ii) using the argument of Proposition 1.3 from Bertsekas [7].

Let  $c(x, u) = x^\top S x + u^\top R u$ ,  $f(x, u) = A x + B u$ , and  $V^K(x_1) = \sum_{t=1}^{\infty} c(x_t, u_t)$  with  $x_{t+1} = f(x_t, u_t)$  and  $u_t = K x_t$ . Let  $V_t = V^{K_t}$ . With these definitions, we have that for all  $x$ :

$$K_{t+1} x = \arg \min_u c(x, u) + V_t(f(x, u)).$$



Therefore,

$$\begin{aligned}
V_t(x) &= c(x, K_t x) + V_t(f(x, K_t x)) \\
&\geq c(x, K_{t+1} x) + V_t(f(x, K_{t+1} x)) \\
&= c(x, K_{t+1} x) + c(f(x, K_{t+1} x), K_t f(x, K_{t+1} x)) + V_t(f(f(x, K_{t+1} x), K_t f(x, K_{t+1} x))) \\
&\geq c(x, K_{t+1} x) + c(f(x, K_{t+1} x), K_{t+1} f(x, K_{t+1} x)) + V_t(f(f(x, K_{t+1} x), K_{t+1} f(x, K_{t+1} x))) \\
&\vdots \\
&\geq V_{t+1}(x).
\end{aligned}$$

This proves (i) and (ii).

Now, observe that by partial minimization of a strongly convex quadratic:

$$\begin{aligned}
c(x, K_{t+1} x) + V_t(f(x, K_{t+1} x)) &= \min_u c(x, u) + V_t(f(x, u)) \\
&= x^\top (S + A^\top V_t A - A^\top V_t B (R + B^\top V_t B)^{-1} B^\top V_t A) x \\
&= x^\top F(V_t) x.
\end{aligned}$$

Combined with the above inequalities, this shows that  $V_{t+1} \preceq F(V_t) \preceq V_t$ . Therefore, by (B.3) and Proposition D.4,

$$\begin{aligned}
\delta_\infty(V_{t+1}, V_\star) &\leq \delta_\infty(F(V_t), V_\star) \\
&= \delta_\infty(F(V_t), F(V_\star)) \\
&\leq \frac{\alpha_t}{\lambda_{\min}(Q) + \alpha_t} \delta_\infty(V_t, V_\star),
\end{aligned}$$

where  $\alpha_t = \max\{\lambda_{\max}(A^\top V_t A), \lambda_{\max}(A^\top V_\star A)\} = \lambda_{\max}(A^\top V_t A)$ , since  $V_\star \preceq V_t$ . But since  $V_t \preceq V_0$ , we can upper bound  $\alpha_t \leq \lambda_{\max}(A^\top V_0 A)$ . This proves (iii).  $\square$

## B.2 Approximate Policy Iteration

We now turn to the analysis of approximate policy iteration. Before analyzing Algorithm 2, we analyze a slightly more general algorithm described in Algorithm 4

---

### Algorithm 4 Approximate Policy Iteration for LQR (offline)

---

**Input:** Initial stabilizing controller  $K_0$ ,  $N$  number of policy iterations,  $T$  length of rollout for estimation,  $\sigma_\eta^2$  exploration variance.

- 1: **for**  $t = 0, \dots, N - 1$  **do**
- 2:   Collect a trajectory  $\mathcal{D}_t = \{(x_k^{(t)}, u_k^{(t)}, x_{k+1}^{(t)})\}_{k=1}^T$  using input  $u_k^{(t)} = K_0 x_k^{(t)} + \eta_k^{(t)}$ , with  $\eta_k^{(t)} \sim \mathcal{N}(0, \sigma_\eta^2 I)$ .
- 3:    $\hat{Q}_t = \text{EstimateQ}(\mathcal{D}_t, K_t)$ .
- 4:    $K_{t+1} = G(\hat{Q}_t)$ . [c.f. (2.10)]
- 5: **end for**
- 6: **return**  $K_N$ .

---

In Algorithm 4, the procedure EstimateQ takes as input an off-policy trajectory  $\mathcal{D}_t$  and a policy  $K_t$ , and returns an estimate  $\hat{Q}_t$  of the true  $Q$  function  $Q_t$ . We will analyze Algorithm 4 first assuming that the procedure EstimateQ delivers an estimate with a certain level of accuracy. In order to do this, we define the sequence of variables:

- (i)  $Q_t$  is true state-value function for  $K_t$ .
- (ii)  $V_t$  is true value function for  $K_t$ .
- (iii)  $\bar{K}_{t+1} = G(Q_t)$ .
- (iv)  $\bar{V}_t$  is true value function for  $\bar{K}_t$ .

The following proposition is our main result regarding Algorithm 4.

**Proposition B.2.** Consider the sequence of updates defined by Algorithm 4. Suppose we start with a stabilizing  $K_0$  and let  $V_0$  denote its value function. Fix an  $\varepsilon > 0$ . Define the following variables:

$$\begin{aligned}\mu &:= \min\{\lambda_{\min}(S), \lambda_{\min}(R)\}, \\ Q_{\max} &:= \max\{\|S\|, \|R\|\} + 2(\|A\|^2 + \|B\|^2)\|V_0\|, \\ \gamma &:= \frac{2\|A\|^2\|V_0\|}{\mu + 2\|A\|^2\|V_0\|}, \\ N_0 &:= \lceil \frac{1}{1-\gamma} \log(2\delta_{\infty}(V_0, V_{\star})/\varepsilon) \rceil, \\ \tau &:= \sqrt{\frac{2\|V_0\|}{\mu}}, \\ \rho &:= \sqrt{1 - 1/\tau^2}, \\ \bar{\rho} &:= \text{Avg}(\rho, 1),\end{aligned}$$

where  $\text{Avg}(x, y) = \frac{x+y}{2}$ . Let  $N_1 \geq N_0$ . Suppose the estimates  $\hat{Q}_t$  output by EstimateQ satisfy, for all  $0 \leq t \leq N_1 - 1$ ,  $\hat{Q}_t \succeq \mu I$  and furthermore,

$$\|\hat{Q}_t - Q_t\| \leq \min\left\{\frac{\|V_0\|}{N_1}, \varepsilon\mu(1-\gamma)\right\} \left(\frac{\mu}{28} \frac{(1-\bar{\rho}^2)^2}{\tau^5} \frac{1}{\|B\|_+ \max\{\|S\|, \|R\|\}} \frac{\mu^3}{Q_{\max}^3}\right).$$

Then we have for any  $N$  satisfying  $N_0 \leq N \leq N_1$  the bound  $\delta_{\infty}(V_N, V_{\star}) \leq \varepsilon$ . We also have that for all  $0 \leq t \leq N_1$ ,  $A + BK_t$  is  $(\tau, \bar{\rho})$ -stable and  $\|K_t\| \leq 2Q_{\max}/\mu$ .

*Proof.* We first start by observing that if  $V, V_0$  are value functions satisfying  $V \preceq V_0$ , then their state-value functions also satisfy  $Q \preceq Q_0$ . This is because

$$\begin{aligned}Q &= \begin{bmatrix} S & 0 \\ 0 & R \end{bmatrix} + \begin{bmatrix} A^T \\ B^T \end{bmatrix} V \begin{bmatrix} A & B \end{bmatrix} \\ &\preceq \begin{bmatrix} S & 0 \\ 0 & R \end{bmatrix} + \begin{bmatrix} A^T \\ B^T \end{bmatrix} V_0 \begin{bmatrix} A & B \end{bmatrix} = Q_0.\end{aligned}$$

From this we also see that any state-value function satisfies  $Q \succeq \begin{bmatrix} S & 0 \\ 0 & R \end{bmatrix}$ .

The proof proceeds as follows. We observe that since  $\bar{V}_{t+1} \preceq V_t$  (Proposition B.1-(ii)):

$$V_t = V_t - \bar{V}_t + \bar{V}_t - V_{t-1} + V_{t-1} \preceq V_t - \bar{V}_t + V_{t-1}.$$

Therefore, by triangle inequality we have  $\|V_t\| \leq \|V_t - \bar{V}_t\| + \|V_{t-1}\|$ . Supposing for now that we can ensure for all  $1 \leq t \leq N_1$ :

$$\|V_t - \bar{V}_t\| \leq \frac{\|V_0\|}{N}, \tag{B.4}$$

unrolling the recursion for  $\|V_t\|$  for  $N_1$  steps ensures that  $\|V_t\| \leq 2\|V_0\|$  for all  $0 \leq t \leq N_1$ . Furthermore,

$$\begin{aligned}\|Q_t\| &\leq \max\{\|S\|, \|R\|\} + \|[A \ B]\|^2 \|V_t\| \\ &\leq \max\{\|S\|, \|R\|\} + 2(\|A\|^2 + \|B\|^2)\|V_0\| \\ &= Q_{\max}.\end{aligned}$$

for all  $0 \leq t \leq N_1$ .

Now, by triangle inequality and Proposition B.1-(iii), for all  $0 \leq t \leq N_1 - 1$ ,

$$\begin{aligned}\delta_{\infty}(V_{t+1}, V_{\star}) &\leq \delta_{\infty}(V_{t+1}, \bar{V}_{t+1}) + \delta_{\infty}(\bar{V}_{t+1}, V_{\star}) \\ &\leq \delta_{\infty}(V_{t+1}, \bar{V}_{t+1}) + \gamma \cdot \delta_{\infty}(V_t, V_{\star}) \\ &\leq \frac{\|V_{t+1} - \bar{V}_{t+1}\|}{\mu} + \gamma \cdot \delta_{\infty}(V_t, V_{\star}),\end{aligned} \tag{B.5}$$

where  $\gamma = \frac{2\|A\|^2\|V_0\|}{\mu+2\|A\|^2\|V_0\|}$ , and the last inequality uses Proposition D.3 combined with the fact that  $V_{t+1} \succeq \mu I$  and  $\bar{V}_{t+1} \succeq \mu I$ .

We now focus on bounding  $\|V_{t+1} - \bar{V}_{t+1}\|$ . To do this, we first bound  $\|K_{t+1} - \bar{K}_{t+1}\|$ , and then use the Lyapunov perturbation result from Section E. First, observe the simple bounds:

$$\begin{aligned}\|\bar{K}_{t+1}\| &= \|G(Q_t)\| \leq \frac{\|Q_t\|}{\mu} \leq \frac{Q_{\max}}{\mu}, \\ \|K_{t+1}\| &= \|G(\hat{Q}_t)\| \leq \frac{\|\hat{Q}_t\|}{\mu} \leq \frac{\Delta + Q_{\max}}{\mu} \leq \frac{2Q_{\max}}{\mu}.\end{aligned}$$

where the second bound uses the assumption that the estimates  $\hat{Q}_t$  satisfy  $\hat{Q}_t \succeq \mu I$  and  $\|\hat{Q}_t - Q_t\| \leq \Delta$  with

$$\Delta \leq Q_{\max}. \quad (\text{B.6})$$

Now, by Proposition E.3 we have:

$$\begin{aligned}\|K_{t+1} - \bar{K}_{t+1}\| &= \|G(\hat{Q}_t) - G(Q_t)\| \\ &\leq \frac{(1 + \|\bar{K}_{t+1}\|)\|\hat{Q}_t - Q_t\|}{\mu} \\ &\leq \frac{(1 + Q_{\max}/\mu)\Delta}{\mu} \\ &\leq \frac{2Q_{\max}}{\mu^2}\Delta.\end{aligned}$$

Above, the last inequality holds since  $Q_{\max} \geq \mu$  by definition.

By Proposition E.4, because  $\bar{V}_{t+1} \preceq V_t$ , we know that  $\bar{K}_{t+1}$  satisfies for all  $k \geq 0$ :

$$\begin{aligned}\|(A + B\bar{K}_{t+1})^k\| &\leq \sqrt{\frac{\|V_t\|}{\lambda_{\min}(S)}} \cdot \sqrt{1 - \lambda_{\min}(V_t^{-1}S)}^k \\ &\leq \sqrt{\frac{2\|V_0\|}{\mu}} \sqrt{1 - \frac{\mu}{2\|V_0\|}}^k = \tau \cdot \rho^k.\end{aligned}$$

Let us now assume that  $\Delta$  satisfies:

$$\frac{2Q_{\max}}{\mu^2} \cdot \Delta \leq \frac{1 - \rho}{2\tau\|B\|}. \quad (\text{B.7})$$

Then by Lemma E.1, we know that  $\|(A + BK_{t+1})^k\| \leq \tau \cdot \bar{\rho}^k$ . Hence, we have that  $A + BK_{t+1}$  is  $(\tau, \bar{\rho})$ -stable.

Next, by the Lyapunov perturbation result of Proposition E.6,

$$\begin{aligned}\|V_{t+1} - \bar{V}_{t+1}\| &= \|\text{dlyap}(A + BK_{t+1}, S + K_{t+1}^\top RK_{t+1}) - \text{dlyap}(A + B\bar{K}_{t+1}, S + \bar{K}_{t+1}^\top R\bar{K}_{t+1})\| \\ &\leq \frac{\tau^2}{1 - \bar{\rho}^2} \|K_{t+1}^\top RK_{t+1} - \bar{K}_{t+1}^\top R\bar{K}_{t+1}\| \\ &\quad + \frac{\tau^4}{(1 - \bar{\rho}^2)^2} \|B(K_{t+1} - \bar{K}_{t+1})\| (\|A + BK_{t+1}\| + \|A + B\bar{K}_{t+1}\|) \|S + \bar{K}_{t+1}^\top R\bar{K}_{t+1}\|.\end{aligned}$$

We bound:

$$\begin{aligned}
\|K_{t+1}^\top RK_{t+1} - \bar{K}_{t+1}^\top R\bar{K}_{t+1}\| &\leq \|R\| \|K_{t+1} - \bar{K}_{t+1}\| (\|K_{t+1}\| + \|\bar{K}_{t+1}\|) \\
&\leq \frac{6\|R\|Q_{\max}^2}{\mu^3} \Delta, \\
\|B(K_{t+1} - \bar{K}_{t+1})\| &\leq \frac{2\|B\|Q_{\max}}{\mu^2} \Delta, \\
\max\{\|A + BK_{t+1}\|, \|A + B\bar{K}_{t+1}\|\} &\leq \tau, \\
\|S + \bar{K}_{t+1}^\top R\bar{K}_{t+1}\| &\leq \|S\| + \frac{\|R\|Q_{\max}^2}{\mu^2}.
\end{aligned}$$

Therefore,

$$\begin{aligned}
\|V_{t+1} - \bar{V}_{t+1}\| &\leq \frac{\tau^2}{1 - \bar{\rho}^2} \frac{6\|R\|Q_{\max}^2}{\mu^3} \Delta + 8 \frac{\tau^5}{(1 - \bar{\rho}^2)^2} \|B\| \max\{\|S\|, \|R\|\} \frac{Q_{\max}^3}{\mu^4} \Delta \\
&= \frac{1}{\mu} \left( \frac{\tau^2}{1 - \bar{\rho}^2} \frac{6\|R\|Q_{\max}^2}{\mu^2} + 8 \frac{\tau^5}{(1 - \bar{\rho}^2)^2} \|B\| \max\{\|S\|, \|R\|\} \frac{Q_{\max}^3}{\mu^3} \right) \Delta \\
&\leq \frac{14}{\mu} \frac{\tau^5}{(1 - \bar{\rho}^2)^2} \|B\|_+ \max\{\|S\|, \|R\|\} \frac{Q_{\max}^3}{\mu^3} \Delta.
\end{aligned}$$

Now suppose that  $\Delta$  satisfies:

$$\begin{aligned}
\Delta &\leq \frac{1}{2} \varepsilon \mu (1 - \gamma) \left( \frac{\mu}{14} \frac{(1 - \bar{\rho}^2)^2}{\tau^5} \frac{1}{\|B\|_+ \max\{\|S\|, \|R\|\}} \frac{\mu^3}{Q_{\max}^3} \right) \\
&= \frac{\varepsilon}{28} \mu^2 (1 - \gamma) \frac{(1 - \bar{\rho}^2)^2}{\tau^5} \frac{1}{\|B\|_+ \max\{\|S\|, \|R\|\}} \frac{\mu^3}{Q_{\max}^3}, \tag{B.8}
\end{aligned}$$

we have for all  $t \leq N_1 - 1$  from (B.5):

$$\delta_\infty(V_{t+1}, V_\star) \leq (1 - \gamma)\varepsilon/2 + \gamma \cdot \delta_\infty(V_t, V_\star).$$

Unrolling this recursion, we have that for any  $N \leq N_1$ :

$$\delta_\infty(V_N, V_\star) \leq \gamma^N \cdot \delta_\infty(V_0, V_\star) + \varepsilon/2.$$

Now observe that for any  $N \geq N_0 := \lceil \frac{1}{1-\gamma} \log(2\delta_\infty(V_0, V_\star)/\varepsilon) \rceil$ , we obtain:

$$\delta_\infty(V_N, V_\star) \leq \varepsilon.$$

The claim now follows by combining our four requirements on  $\Delta$  given in (B.6), (B.4), (B.7), and (B.8).  $\square$

We now proceed to make several simplifications to Proposition B.2 in order to make the result more presentable. These simplifications come with the tradeoff of introducing extra conservatism into the bounds.

Our first simplification of Proposition B.2 is the following corollary.

**Corollary B.3.** *Consider the sequence of updates defined by Algorithm 4. Suppose we start with a stabilizing  $K_0$  and let  $V_0$  denote its value function. Define the following variables:*

$$\begin{aligned}
\mu &:= \min\{\lambda_{\min}(S), \lambda_{\min}(R)\}, \\
L &:= \max\{\|S\|, \|R\|\} + 2(\|A\|^2 + \|B\|^2 + 1)\|V_0\|_+, \\
N_0 &:= \lceil (1 + L/\mu) \log(2\delta_\infty(V_0, V_\star)/\varepsilon) \rceil.
\end{aligned}$$

Fix an  $N_1 \geq N_0$  and suppose that

$$\varepsilon \leq \frac{1}{\mu} \left( 1 + \frac{L}{\mu} \right) \frac{\|V_0\|}{N_1}. \tag{B.9}$$

Suppose the estimates  $\hat{Q}_t$  output by EstimateQ satisfy, for all  $0 \leq t \leq N_1 - 1$ ,  $\hat{Q}_t \succeq \mu I$  and furthermore,

$$\|\hat{Q}_t - Q_t\| \leq \frac{\varepsilon}{448} \frac{\mu}{\mu + L} \left(\frac{\mu}{L}\right)^{19/2}.$$

Then we have for any  $N_0 \leq N \leq N_1$  that  $\delta_\infty(V_N, V_\star) \leq \varepsilon$ . We also have that for any  $0 \leq t \leq N_1$ , that  $A + BK_t$  is  $(\sqrt{L/\mu}, \text{Avg}(\sqrt{1 - \mu/L}, 1))$ -stable and  $\|K_t\| \leq 2L/\mu$ .

*Proof.* First, observe that the map  $x \mapsto \frac{x}{\mu+x}$  is increasing, and therefore  $\gamma \leq \frac{L}{\mu+L}$  which implies that  $1 - \gamma \geq \frac{\mu}{\mu+L}$ . Therefore if  $\varepsilon \leq \frac{1}{\mu} \left(1 + \frac{L}{\mu}\right) \frac{\|V_0\|}{N_1}$  holds, then we can bound:

$$\min \left\{ \frac{\|V_0\|}{N_1}, \varepsilon \mu (1 - \gamma) \right\} \geq \varepsilon \mu \left( \frac{\mu}{\mu + L} \right).$$

Next, observe that

$$1 - \bar{\rho}^2 = (1 + \bar{\rho})(1 - \bar{\rho}) = (1 + 1/2 + \rho/2)(1/2 - \rho/2) \geq (1 + \rho)(1 - \rho)/4 = (1 - \rho^2)/4.$$

Therefore,

$$(1 - \bar{\rho}^2)^2 \geq (1 - (1 - \mu/L))^2/16 = (1/16)(\mu/L)^2.$$

We also have that  $\tau \leq \sqrt{\frac{L}{\mu}}$ . This means we can bound:

$$\frac{\mu}{28} \frac{(1 - \bar{\rho}^2)^2}{\tau^5} \frac{1}{\|B\|_+ \max\{\|S\|, \|R\|\}} \frac{\mu^3}{Q_{\max}^3} \geq \frac{\mu}{28 \cdot 16} (\mu/L)^{5/2+2} \frac{\mu^3}{L^5} = \frac{1}{448L} \left(\frac{\mu}{L}\right)^{17/2}.$$

Therefore,

$$\min \left\{ \frac{\|V_0\|}{N_1}, \varepsilon \mu (1 - \gamma) \right\} \frac{\mu}{28} \frac{(1 - \bar{\rho}^2)^2}{\tau^5} \frac{1}{\|B\|_+ \max\{\|S\|, \|R\|\}} \frac{\mu^3}{Q_{\max}^3} \geq \frac{\varepsilon}{448} \left( \frac{\mu}{\mu + L} \right) \left( \frac{\mu}{L} \right)^{19/2}.$$

The claim now follows from Proposition B.2.  $\square$

Corollary B.3 gives a guarantee in terms of  $\delta_\infty(V_N, V_\star) \leq \varepsilon$ . By Proposition D.5, this implies a bound on the error of the value functions  $\|V_N - V_\star\| \leq \mathcal{O}(\varepsilon)$  for  $\varepsilon \leq 1$ . In the next corollary, we show we can also control the error  $\|K_N - K_\star\| \leq \mathcal{O}(\varepsilon)$ .

**Corollary B.4.** Consider the sequence of updates defined by Algorithm 4. Suppose we start with a stabilizing  $K_0$  and let  $V_0$  denote its value function. Define the following variables:

$$\begin{aligned} \mu &:= \min\{\lambda_{\min}(S), \lambda_{\min}(R)\}, \\ L &:= \max\{\|S\|, \|R\|\} + 2(\|A\|^2 + \|B\|^2 + 1)\|V_0\|_+, \\ N_0 &:= \left\lceil (1 + L/\mu) \log \left( \frac{2 \log(\|V_0\|/\lambda_{\min}(V_\star))}{\varepsilon} \right) \right\rceil. \end{aligned}$$

Suppose that  $\varepsilon > 0$  satisfies:

$$\varepsilon \leq \min \left\{ 1, \frac{2 \log(\|V_0\|/\lambda_{\min}(V_\star))}{e}, \frac{\|V_\star\|^2}{8\mu^2 \log(\|V_0\|/\lambda_{\min}(V_\star))} \right\}.$$

Suppose we run Algorithm 4 for  $N := N_0 + 1$  iterations. Suppose the estimates  $\hat{Q}_t$  output by EstimateQ satisfy, for all  $0 \leq t \leq N_0$ ,  $\hat{Q}_t \succeq \mu I$  and furthermore,

$$\|\hat{Q}_t - Q_t\| \leq \frac{\varepsilon}{448} \frac{\mu}{\mu + L} \left(\frac{\mu}{L}\right)^{19/2}. \quad (\text{B.10})$$

We have that:

$$\|K_N - K_\star\| \leq 5 \left( \frac{L}{\mu} \right)^2 \varepsilon$$

and that  $A + BK_t$  is  $(\sqrt{L/\mu}, \text{Avg}(\sqrt{1 - \mu/L}, 1))$ -stable and  $\|K_t\| \leq 2L/\mu$  for all  $0 \leq t \leq N$ .

*Proof.* We set  $N_1 = N_0 + 1$ . From this, we compute:

$$\begin{aligned}
\|K_{N_1} - K_\star\| &= \|G(\widehat{Q}_{N_0}) - G(Q_\star)\| \\
&\stackrel{(a)}{\leq} \frac{(1 + \|G(Q_\star)\|)}{\mu} \|\widehat{Q}_{N_0} - Q_\star\| \\
&\leq \frac{(1 + \|G(Q_\star)\|)}{\mu} (\|\widehat{Q}_{N_0} - Q_{N_0}\| + \|Q_{N_0} - Q_\star\|) \\
&= \frac{(1 + \|G(Q_\star)\|)}{\mu} \left( \|\widehat{Q}_{N_0} - Q_{N_0}\| + \left\| \begin{bmatrix} A^\top \\ B^\top \end{bmatrix} (V_{N_0} - V_\star) \begin{bmatrix} A & B \end{bmatrix} \right\| \right) \\
&\leq \frac{(1 + \|G(Q_\star)\|)}{\mu} (\|\widehat{Q}_{N_0} - Q_{N_0}\| + \|[A \ B]\|^2 \|V_{N_0} - V_\star\|) \\
&\stackrel{(b)}{\leq} \frac{(1 + \|G(Q_\star)\|)}{\mu} \left( \frac{\varepsilon}{448} \frac{\mu}{\mu + L} \left(\frac{\mu}{L}\right)^{19/2} + \|[A \ B]\|^2 \|V_{N_0} - V_\star\| \right) \\
&\stackrel{(c)}{\leq} \frac{(1 + \|G(Q_\star)\|)}{\mu} \left( \frac{\varepsilon}{448} \frac{\mu}{\mu + L} \left(\frac{\mu}{L}\right)^{19/2} + e(\|A\|^2 + \|B\|^2) \|V_\star\| \varepsilon \right) \\
&\leq \frac{2L}{\mu^2} \left( \frac{1}{448} \frac{\mu}{\mu + L} \left(\frac{\mu}{L}\right)^{19/2} + 2L \right) \varepsilon \\
&= \left( \frac{1}{224} \frac{1}{\mu + L} \left(\frac{\mu}{L}\right)^{17/2} + 4 \left(\frac{L}{\mu}\right)^2 \right) \varepsilon \\
&\leq 5 \left(\frac{L}{\mu}\right)^2 \varepsilon.
\end{aligned}$$

Above, (a) follows from Proposition E.3, (b) follows from the bound on  $\|\widehat{Q}_{N_0} - Q_{N_0}\|$  from Corollary B.3, and (c) follows from Proposition D.5 and the fact that  $\delta_\infty(V_{N_0}, V_\star) \leq \varepsilon$  from Corollary B.3.

Next, we observe that since  $V_0 \succeq V_\star$ :

$$\delta_\infty(V_0, V_\star) = \log(\|V_\star^{-1/2} V_0 V_\star^{-1/2}\|) \leq \log(\|V_0\|/\lambda_{\min}(V_\star)).$$

Hence we can upper bound  $N_0$  from Corollary B.3 by:

$$N_0 = 2(1 + L/\mu) \log(2 \log(\|P_0\|/\lambda_{\min}(V_\star))/\varepsilon).$$

From (B.9), the requirement on  $\varepsilon$  is that:

$$\varepsilon \leq \min \left\{ \frac{\|V_0\|}{2\mu} \frac{1}{\log\left(\frac{2 \log(\|V_0\|/\lambda_{\min}(V_\star))}{\varepsilon}\right)}, 1 \right\}.$$

We will show with Proposition F.3 that a sufficient condition is that:

$$\varepsilon \leq \min \left\{ 1, \frac{2 \log(\|V_0\|/\lambda_{\min}(V_\star))}{e}, \frac{\|V_\star\|^2}{8\mu^2 \log(\|V_0\|/\lambda_{\min}(V_\star))} \right\}.$$

□

With Corollary B.4 in place, we are now ready to prove Theorem 2.2.

*Proof of Theorem 2.2.* Let  $L_0 := A + BK_0$  and let  $(\tau, \rho)$  be such that  $L_0$  is  $(\tau, \rho)$ -stable. We know we can pick  $\tau = \sqrt{L/\mu}$  and  $\rho = \sqrt{1 - \mu/L}$ . The covariance  $\Sigma_t$  of  $x_t$  satisfies:

$$\Sigma_t = L_0^t \Sigma_0 (L_0^t)^\top + P_t \preceq \tau^2 \rho^{2t} \|\Sigma_0\| I + P_\infty.$$

Hence for either  $t = 0$  or  $t \geq \log(\tau)/(1 - \rho)$ ,  $\|\Sigma_t\| \leq \|\Sigma_0\| + \|P_\infty\|$ . Therefore, if the trajectory length  $T \geq \log(\tau)/(1 - \rho)$ , then the operator norm of the initial covariance for every invocation of



LSTD-Q can be bounded by  $\|\Sigma_0\| + \|P_\infty\|$ , and therefore the proxy variance (2.7) can be bounded by:

$$\begin{aligned}\bar{\sigma}^2 &\leq \tau^2 \rho^4 \|\Sigma_0\| + (1 + \tau^2 \rho^4) \|P_\infty\| + \sigma_\eta^2 \|B\|^2 \\ &\leq 2(L/\mu)(\|\Sigma_0\| + \|P_\infty\| + \sigma_\eta^2 \|B\|^2).\end{aligned}$$

By Corollary B.4, when condition (B.10) holds, we have that  $A + BK_t$  is  $(\tau, \text{Avg}(\rho, 1))$  stable,  $\|K_t\| \leq 2L/\mu$ , and  $\|Q_t\| \leq L$  for all  $0 \leq t \leq N_0 + 1$ . We now define  $\bar{\varepsilon} := 5(L/\mu)^2 \varepsilon$ . If we can ensure that

$$\|\hat{Q}_t - Q_t\| \leq \frac{1}{2240} \left( \frac{\mu}{\mu + L} \right) \left( \frac{\mu}{L} \right)^{23/2} \bar{\varepsilon}, \quad (\text{B.11})$$

then if

$$\bar{\varepsilon} \leq 5 \left( \frac{L}{\mu} \right)^2 \min \left\{ 1, \frac{2 \log(\|V_0\|/\lambda_{\min}(V_\star))}{e}, \frac{\|V_\star\|^2}{8\mu^2 \log(\|V_0\|/\lambda_{\min}(V_\star))} \right\},$$

then by Corollary B.4 we ensure that  $\|K_N - K\| \leq \bar{\varepsilon}$ . By Theorem 2.1, (B.11) can be ensured by first observing that  $Q_t \succeq \mu I$  and therefore for any symmetric  $\hat{Q}$  we have:

$$\|\text{Proj}_\mu(\hat{Q}) - Q_t\| \leq \|\text{Proj}_\mu(\hat{Q}) - Q_t\|_F \leq \|\hat{Q} - Q_t\|_F.$$

Above, the last inequality holds because  $\text{Proj}_\mu(\cdot)$  is the Euclidean projection operator associated with  $\|\cdot\|_F$  onto the convex set  $\{Q : Q \succeq \mu I, Q = Q^\top\}$ . Now combining (2.9) and (2.8) and using the bound  $\frac{\tau^2}{\rho^2(1-\rho^2)} \leq \frac{(L/\mu)^2}{1-\mu/L}$ :

$$\begin{aligned}T &\geq \tilde{O}(1) \max \left\{ (n+d)^2, \right. \\ &\quad \frac{L^2}{(1-\mu/L)^2} \left( \frac{L}{\mu} \right)^{17} \frac{(n+d)^4}{\sigma_\eta^4} \sigma_w^2 (\|\Sigma_0\| + \|P_\infty\| + \sigma_\eta^2 \|B\|^2), \\ &\quad \left. \frac{1}{\bar{\varepsilon}^2} \frac{L^4}{(1-\mu/L)^2} \left( \frac{L}{\mu} \right)^{42} \frac{(n+d)^3}{\sigma_\eta^4} \sigma_w^2 (\|\Sigma_0\| + \|P_\infty\| + \sigma_\eta^2 \|B\|^2) \right\}.\end{aligned}$$

Theorem 2.2 now follows.  $\square$

## C Analysis for Adaptive LSPI

In this section we develop our analysis for Algorithm 3. We start by presenting a meta adaptive algorithm (Algorithm 5) and lay out sufficient conditions for the meta algorithm to achieve sub-linear regret. We then specialize the meta algorithm to use LSPI as a sub-routine.

---

### Algorithm 5 General Adaptive LQR Algorithm

---

**Input:** Initial stabilizing controller  $K^{(0)}$ , number of epochs  $E$ , epoch multiplier  $T_{\text{mult}}$ .

- 1: **for**  $i = 0, \dots, E - 1$  **do**
  - 2:   Set  $T_i = T_{\text{mult}} 2^i$ .
  - 3:   Set  $\sigma_{\eta,i}^2 = \sigma_w^2 \left( \frac{1}{2^i} \right)^{1/(1+\alpha)}$ .
  - 4:   Roll system forward  $T_i$  steps with input  $u_t^{(i)} = K^{(i)} x_t^{(i)} + \eta_t^{(i)}$ , where  $\eta_t^{(i)} \sim \mathcal{N}(0, \sigma_{\eta,i}^2 I)$ .
  - 5:   Let  $\mathcal{D}_i = \{(x_t^{(i)}, u_t^{(i)}, x_{t+1}^{(i)})\}_{t=0}^{T_i}$ .
  - 6:   Set  $K^{(i+1)} = \text{EstimateK}(K^{(i)}, \mathcal{D}_i)$ .
  - 7: **end for**
- 

Algorithm 5 is the general form of the  $\varepsilon$ -greedy strategy for adaptive LQR recently described in Dean et al. [13] and Mania et al. [26]. We study Algorithm 5 under the following assumption regarding the sub-routine EstimateK.

**Assumption 1.** We assume there exists two functions  $C_{\text{req}}, C_{\text{err}}$  and  $\alpha \geq 1$  such that the following holds. Suppose the controller  $K^{(i)}$  that generates  $\mathcal{D}_i$  stabilizes  $(A, B)$  and  $V^{(i)}$  is its associated value function, the initial condition  $x_0^{(i)} \sim \mathcal{N}(0, \Sigma_0^{(i)})$ , and that the trajectory  $\mathcal{D}_i$  is collected via  $u_t^{(i)} = K^{(i)}x_t^{(i)} + \eta_t^{(i)}$  with  $\eta_t^{(i)} \sim \mathcal{N}(0, \sigma_{\eta,i}^2 I)$ . For any  $0 < \varepsilon < C_{\text{req}}(\|V^{(i)}\|)$  and any  $\delta \in (0, 1)$ , as long as  $|\mathcal{D}_i|$  satisfies:

$$|\mathcal{D}_i| \geq \frac{C_{\text{err}}(\|V^{(i)}\|, \|\Sigma_0^{(i)}\|)}{\varepsilon^2} \frac{1}{\sigma_{\eta,i}^{2\alpha}} \text{polylog}(|\mathcal{D}_i|, 1/\sigma_{\eta,i}^\alpha, 1/\delta, 1/\varepsilon), \quad (\text{C.1})$$

then we have with probability at least  $1 - \delta$  that  $\|K^{(i+1)} - K_\star\| \leq \varepsilon$ . We also assume the function  $C_{\text{req}}$  (resp.  $C_{\text{err}}$ ) is monotonically decreasing (resp. increasing) with respect to its arguments, and that the functions are allowed to depend in any way on the problem parameters  $(A, B, S, R, n, d, \sigma_w^2, K_\star, P_\star)$ .

Before turning to the analysis of Algorithm 5, we state a simple proposition that bounds the covariance matrix along the trajectory induced by Algorithm 5.

**Proposition C.1.** Fix a  $j \geq 1$ . Let  $\Sigma_0^{(j)}$  denote the covariance matrix of  $x_0^{(j)}$ . Suppose that for all  $0 \leq i < j$  each  $K^{(i)}$  stabilizes  $(A, B)$   $A + BK^{(i)}$  is  $(\tau, \rho)$ -stable. Also suppose that  $\sigma_{\eta,i} \leq \sigma_w$  and that

$$T_{\text{mult}} \geq \frac{1}{2(1-\rho)} \log \left( \frac{n\tau^2}{\rho^2} \right).$$

We have that:

$$\text{tr}(\Sigma_0^{(j)}) \leq \sigma_w^2(1 + \|B\|^2)n \frac{\tau^2}{(1-\rho^2)^2}.$$

*Proof.* Let  $L_i = A + BK^{(i)}$ . We write:

$$\begin{aligned} \mathbb{E}[\|x_0^{(i)}\|^2] &= \mathbb{E}[\mathbb{E}[\|x_0^{(i)}\|^2 | x_0^{(i-1)}]] \\ &= \mathbb{E}[\mathbb{E}[\text{tr}(x_0^{(i)}(x_0^{(i)})^\top) | x_0^{(i-1)}]] \\ &\leq \mathbb{E}[\text{tr}(L_{i-1}^{T_{i-1}} x_0^{(i-1)} (x_0^{(i-1)})^\top (L_{i-1}^{T_{i-1}})^\top)] + (\sigma_w^2 + \sigma_{\eta,i-1}^2 \|B\|^2)n \frac{\tau^2}{1-\rho^2} \\ &\leq n\tau^2 \rho^{2T_{i-1}} \mathbb{E}[\|x_0^{(i-1)}\|^2] + \sigma_w^2(1 + \|B\|^2)n \frac{\tau^2}{1-\rho^2}. \end{aligned}$$

We have that  $x_0^{(0)} = 0$ . Hence if we choose  $T_{\text{mult}}$  such that  $n\tau^2 \rho^{2T_{\text{mult}}} \leq \rho^2$ , we obtain the recurrence:

$$\mathbb{E}[\|x_0^{(i)}\|^2] \leq \rho^2 \mathbb{E}[\|x_0^{(i-1)}\|^2] + \sigma_w^2(1 + \|B\|^2)n \frac{\tau^2}{1-\rho^2},$$

and therefore  $\mathbb{E}[\|x_0^{(i)}\|^2] \leq \sigma_w^2(1 + \|B\|^2)n \frac{\tau^2}{(1-\rho^2)^2}$  for all  $i$ . This is ensured if

$$T_{\text{mult}} \geq \frac{1}{2(1-\rho)} \log(n\tau^2/\rho^2).$$

□

Next, we state a lemma that relates the instantaneous cost to the expected cost. The proof is based on the Hanson-Wright inequality, and appears in Dean et al. [13]. Let the notation  $J(K; \Sigma)$  denote the infinite horizon average LQR cost when the feedback  $u_t = Kx_t$  is played and when the process noise is  $w_t \sim \mathcal{N}(0, \Sigma)$ . Explicitly:

$$J(K; \Sigma) = \text{tr}(\Sigma V(K)), \quad V(K) = \text{dlyap}(A + BK, S + K^\top RK). \quad (\text{C.2})$$

With this notation, we have the following lemma.

**Lemma C.2** (Lemma D.2, [13]). *Let  $x_0 \sim \mathcal{N}(0, \Sigma_0)$  and suppose that  $u_t = Kx_t + \eta_t$  with  $A + BK$  as  $(\tau, \rho)$ -stable and  $\eta_t \sim \mathcal{N}(0, \sigma_\eta^2 I)$ . We have that with probability at least  $1 - \delta$ :*

$$\begin{aligned} \sum_{t=1}^T x_t^\top Q x_t + u_t^\top R u_t &\leq T J(K; \sigma_w^2 I + \sigma_\eta^2 B B^\top) \\ &\quad + c\sqrt{nT} \frac{\tau^2}{(1-\rho)^2} (\|\Sigma_0\| + \sigma_w^2 + \sigma_\eta^2 \|B\|^2) \|Q + K^\top R K\| \log(1/\delta). \end{aligned}$$

Finally, we state a second order perturbation result from Fazel et al. [16], which was recently used by Mania et al. [26] to study certainty equivalent controllers.

**Lemma C.3** (Lemma 12, [16]). *Let  $K$  stabilize  $(A, B)$  with  $A + BK$  as  $(\tau, \rho)$ -stable, and let  $K_\star$  be the optimal LQR controller for  $(A, B, Q, R)$  and  $V_\star$  be the optimal value function. We have that:*

$$J(K) - J_\star \leq \sigma_w^2 \frac{\tau^2}{1-\rho^2} \|R + B^\top V_\star B\| \|K - K_\star\|_F^2.$$

With these tools in place, we are ready to state our main result regarding the regret incurred (c.f. (2.16)) by Algorithm 5.

**Proposition C.4.** *Fix a  $\delta \in (0, 1)$ . Suppose that EstimateK satisfies Assumption 1. Let the initial feedback  $K^{(0)}$  stabilize  $(A, B)$  and let  $V^{(0)}$  denote its associated value function. Also let  $K_\star$  denote the optimal LQR controller and let  $V_\star$  denote the optimal value function. Let  $\Gamma_\star = 1 + \max\{\|A\|, \|B\|, \|V^{(0)}\|, \|V_\star\|, \|K^{(0)}\|, \|K_\star\|, \|Q\|, \|R\|\}$ . Define the following bounds:*

$$\begin{aligned} K_{\max} &:= \Gamma_\star, \\ V_{\max} &:= 4 \frac{\Gamma_\star^5}{\lambda_{\min}(S)^2}, \\ \Sigma_{\max} &:= 4\sigma_w^2 n \frac{\Gamma_\star^4}{\lambda_{\min}(S)^2}. \end{aligned}$$

Suppose that  $T_{\text{mult}}$  satisfies:

$$T_{\text{mult}} \geq \max \left\{ 1, \frac{\Gamma_\star^8}{\lambda_{\min}(S)^4}, \frac{1}{C_{\text{req}}^4(V_{\max})} \right\} \frac{C_{\text{err}}^2(V_{\max}, \Sigma_{\max})}{\sigma_w^4} \text{poly}(\alpha) \text{polylog}(1/\sigma_w, E/\delta).$$

With probability at least  $1 - \delta$ , we have that:

$$\begin{aligned} \text{Regret}(T) &\leq \sigma_w^{2(1-\alpha)} d \frac{\Gamma_\star^7}{\lambda_{\min}(S)^2} C_{\text{err}}^2(V_{\max}, \Sigma_{\max}) \left( \frac{T+1}{T_{\text{mult}}} \right)^{\alpha/(\alpha+1)} \text{polylog}(T/\delta) \\ &\quad + T_{\text{mult}} \Gamma_\star^2 J_\star \left( \frac{T+1}{T_{\text{mult}}} \right)^{\alpha/(\alpha+1)} \\ &\quad + \mathcal{O}(1) n^{3/2} \sqrt{T} \sigma_w^2 \frac{\Gamma_\star^9}{\lambda_{\min}(S)^4} \log(T/\delta) + o_T(1). \end{aligned}$$

*Proof.* We state the proof assuming that  $T$  is at an epoch boundary for simplicity. Each epoch has length  $T_i = T_{\text{mult}} 2^i$ . Let  $T_0 + T_1 + \dots + T_{E-1} = T$ . This means that  $E = \log_2((T+1)/T_{\text{mult}})$ .

We start by observing that by Proposition E.4, we have that  $A + BK^{(0)}$  is  $(\tau, \rho)$ -stable for  $\tau := \sqrt{\|V^{(0)}\|/\lambda_{\min}(S)}$  and  $\rho := \sqrt{1 - \lambda_{\min}(S)/\|V^{(0)}\|}$ . We will show that  $A + BK^{(i)}$  is  $(\tau, \bar{\rho})$ -stable for  $i = 1, \dots, E-1$  for  $\bar{\rho} := \text{Avg}(\rho, 1)$ . By Lemma E.1, this occurs if we can ensure that  $\|K^{(i)} - K_\star\| \leq \frac{(1-\rho)}{2\tau\|B\|}$  for  $i = 1, \dots, E-1$ .

We will also construct bounds  $K_{\max}, V_{\max}, \Sigma_{\max}$  such that  $\|K^{(i)}\| \leq K_{\max}$ ,  $\|V^{(i)}\| \leq V_{\max}$ , and  $\|\Sigma^{(i)}\| \leq \Sigma_{\max}$  for all  $0 \leq i \leq E-1$ . We set the bounds as:

$$\begin{aligned} K_{\max} &:= \max\{\|K^{(0)}\|, \|K_\star\| + 1\}, \\ V_{\max} &:= \max\{\|V^{(0)}\|, \frac{\tau^2}{1-\bar{\rho}^2} (\|Q\| + \|R\| K_{\max}^2)\}, \\ \Sigma_{\max} &:= \sigma_w^2 (1 + \|B\|^2) n \frac{\tau^2}{1-\bar{\rho}^2}. \end{aligned}$$

In what follows, we will use the shorthand  $C_{\text{req}} = C_{\text{req}}(V_{\max})$  and  $C_{\text{err}} = C_{\text{err}}(V_{\max}, \Sigma_{\max})$ .

Before we continue, we first argue that our choice of  $T_{\text{mult}}$  satisfies for all  $i = 1, \dots, E - 1$ :

$$T_{i-1} \geq \max\left\{1, \frac{\tau^2 \|B\|^2}{4(1-\bar{\rho})^2}, \frac{1}{C_{\text{req}}^2}\right\} \frac{C_{\text{err}}}{\sigma_{\eta,i}^{2\alpha}} \text{polylog}(T_{i-1}, 1/\sigma_{\eta,i}^\alpha, 1/\sigma_w, E/\delta). \quad (\text{C.3})$$

Rearranging, this is equivalent to:

$$T_{\text{mult}} \geq \max\left\{1, \frac{\tau^2 \|B\|^2}{4(1-\bar{\rho})^2}, \frac{1}{C_{\text{req}}^2}\right\} 2C_{\text{err}}\sigma_w^{-2} \frac{1}{(2^i)^{1/(1+\alpha)}} \text{polylog}(T_{\text{mult}} 2^i, (2^i)^{\alpha/(1+\alpha)}, 1/\sigma_w, E/\delta).$$

We first remove the dependence on  $i$  on the RHS by taking the maximum over all  $i$ . By Proposition F.2, it suffices to take  $T_{\text{mult}}$  satisfying:

$$T_{\text{mult}} \geq \max\left\{1, \frac{\tau^2 \|B\|^2}{4(1-\bar{\rho})^2}, \frac{1}{C_{\text{req}}^2}\right\} \frac{C_{\text{err}}}{\sigma_w^2} \text{poly}(\alpha) \text{polylog}(T_{\text{mult}}, 1/\sigma_w, E/\delta).$$

We now remove the implicit dependence on  $T_{\text{mult}}$ . By Proposition F.4, it suffices to take  $T_{\text{mult}}$  satisfying:

$$T_{\text{mult}} \geq \max\left\{1, \frac{\tau^2 \|B\|^2}{4(1-\bar{\rho})^2}, \frac{1}{C_{\text{req}}^2}\right\} \frac{C_{\text{err}}}{\sigma_w^2} \times \text{poly}(\alpha) \text{polylog}(1/\sigma_w, E/\delta, \tau, \|B\|, 1/(1-\bar{\rho}), 1/C_{\text{req}}, C_{\text{err}}).$$

We are now ready to proceed.

First we look at the base case  $i = 0$ . Clearly, the bounds work for  $i = 0$  by definition. Now we look at epoch  $i \geq 1$  and we assume the bounds hold for  $\ell = 0, \dots, i - 1$ . For  $i \geq 1$  we define  $\varepsilon_i$  as:

$$\varepsilon_i := \inf \left\{ \varepsilon \in (0, 1) : T_{i-1} \geq \frac{C_{\text{err}}}{\varepsilon^2} \frac{1}{\sigma_{\eta,i}^{2\alpha}} \text{polylog}(T_{i-1}, 1/\sigma_{\eta,i}^\alpha, E/\delta, 1/\varepsilon) \right\}.$$

By Proposition F.1, we have that as long as

$$T_{i-1} \geq C_{\text{err}} \frac{1}{\sigma_{\eta,i}^{2\alpha}} \text{polylog}(T_{i-1}, 1/\sigma_{\eta,i}^\alpha, E/\delta), \quad (\text{C.4})$$

then we have that  $\varepsilon_i$  satisfies:

$$\varepsilon_i^2 \leq \frac{C_{\text{err}}}{T_{i-1} \sigma_{\eta,i}^{2\alpha}} \text{polylog}(T_{i-1}, 1/\sigma_{\eta,i}^\alpha, E/\delta). \quad (\text{C.5})$$

But (C.4) is implied by (C.3), so we know that (C.5) holds. Therefore, we have  $\|K^{(i)} - K_\star\| \leq \varepsilon_i$ .

Now by (C.5), if:

$$\frac{C_{\text{err}}}{T_{i-1} \sigma_{\eta,i}^{2\alpha}} \text{polylog}(T_{i-1}, 1/\sigma_{\eta,i}^\alpha, E/\delta) \leq \min\left\{1, \frac{(1-\bar{\rho})^2}{4\tau^2 \|B\|^2}, C_{\text{req}}^2\right\}, \quad (\text{C.6})$$

then the following is true:

$$\varepsilon_i \leq \min\{1, (1-\bar{\rho})/(2\tau\|B\|), C_{\text{req}}\}.$$

However, (C.6) is also implied by (C.3), so we have by Assumption 1:

$$\|K^{(i)} - K_\star\| \leq \min\{1, (1-\bar{\rho})/(2\tau\|B\|)\}.$$

This has several implications. First, it implies that:

$$\|K^{(i)}\| \leq \|K_\star\| + 1 \leq K_{\max}.$$

Next, it implies by Lemma E.1 that  $A + BK^{(i)}$  is  $(\tau, \bar{\rho})$ -stable. Next, by Proposition C.1, it implies that  $\|\Sigma^{(i)}\| \leq \Sigma_{\max}$ . Finally, letting  $L_i := A + BK^{(i)}$ , we have that:

$$\begin{aligned} \|V^{(i)}\| &= \left\| \sum_{\ell=0}^{\infty} (L_i)^\ell (Q + (K^{(i)})^\top R K^{(i)}) (L_i^\top)^\ell \right\| \\ &\leq \frac{\tau^2}{1-\bar{\rho}^2} (\|Q\| + \|R\| K_{\max}^2) \\ &\leq V_{\max}. \end{aligned}$$

Thus, by induction we have that  $\|K^{(i)}\| \leq K_{\max}$ ,  $\|V^{(i)}\| \leq V_{\max}$ , and  $\|\Sigma^{(i)}\| \leq \Sigma_{\max}$  for all  $0 \leq i \leq E-1$ .

We are now ready to bound the regret. From (C.2), we see the relation  $J(K; \sigma_w^2 I + \sigma_\eta^2 B B^\top) \leq \left(1 + \frac{\sigma_\eta^2 \|B\|^2}{\sigma_w^2}\right) J(K; \sigma_w^2 I)$  holds. Therefore by Lemma C.2 and Lemma C.3,

$$\begin{aligned} \sum_{t=1}^T x_t^\top Q x_t + u_t^\top R u_t - T J_\star &\leq T \left(1 + \frac{\sigma_\eta^2 \|B\|^2}{\sigma_w^2}\right) (J_\star + \sigma_w^2 \frac{\tau^2}{1 - \bar{\rho}^2} \|R + B^\top P_\star B\| \|K - K_\star\|_F^2) - T J_\star \\ &\quad + c\sqrt{nT} \frac{\tau^2}{(1 - \bar{\rho})^2} (\|P_0\| + \sigma_w^2 + \sigma_\eta^2 \|B\|^2) \|Q + K^\top R K\| \log(1/\delta) \\ &\leq T(\sigma_w^2 + \sigma_\eta^2 \|B\|^2) \frac{\tau^2}{1 - \bar{\rho}^2} (\|R\| + \|P_\star\| \|B\|^2) \|K - K_\star\|_F^2 + T \frac{\sigma_\eta^2 \|B\|^2}{\sigma_w^2} J_\star \\ &\quad + c\sqrt{nT} \frac{\tau^2}{(1 - \bar{\rho})^2} (\|P_0\| + \sigma_w^2 + \sigma_\eta^2 \|B\|^2) (\|Q\| + \|K\|^2 \|R\|) \log(1/\delta). \end{aligned}$$

Using the inequality above,

$$\begin{aligned} \text{Regret}(T) &= \sum_{i=0}^{E-1} \sum_{t=1}^{T_i} (x_t^{(i)})^\top Q(x_t^{(i)}) + (u_t^{(i)})^\top R(u_t^{(i)}) - T J_\star \\ &\leq \sum_{i=0}^{E-1} T_i \sigma_w^2 (1 + \|B\|^2) \frac{\tau^2}{1 - \bar{\rho}^2} (\|R\| + \|V_\star\| \|B\|^2) \|K^{(i)} - K_\star\|_F^2 + T_i \frac{\sigma_{\eta,i}^2 \|B\|^2}{\sigma_w^2} J_\star \\ &\quad + c\sqrt{nT_i} \sigma_w^2 (1 + \|B\|^2) n \frac{\tau^4}{(1 - \bar{\rho}^2)^4} (\|Q\| + K_{\max}^2 \|R\|) \log(E/\delta) \\ &\leq \mathcal{O}(1) + \sum_{i=1}^{E-1} \sigma_w^2 (1 + \|B\|^2) \frac{d\tau^2}{1 - \bar{\rho}^2} (\|R\| + \|V_\star\| \|B\|^2) C_{\text{err}}^2 \frac{2}{\sigma_{\eta,i}^{2\alpha}} \text{polylog}(E/\delta, 1/\sigma_{\eta,i}) \\ &\quad + T_i \frac{\sigma_{\eta,i}^2 \|B\|^2}{\sigma_w^2} J_\star \\ &\quad + c\sqrt{nT_i} \sigma_w^2 (1 + \|B\|^2) n \frac{\tau^4}{(1 - \bar{\rho}^2)^4} (\|Q\| + K_{\max}^2 \|R\|) \log(E/\delta) \\ &= 2 \sum_{i=1}^{E-1} \sigma_w^{2-2\alpha} (1 + \|B\|^2) \frac{d\tau^2}{1 - \bar{\rho}^2} (\|R\| + \|V_\star\| \|B\|^2) C_{\text{err}}^2 (2^i)^{\alpha/(1+\alpha)} \text{polylog}(E/\delta, 1/\sigma_{\eta,i}) \\ &\quad + T_{\text{mult}} (2^i)^{\alpha/(1+\alpha)} \|B\|^2 J_\star \\ &\quad + c\sqrt{nT_i} \sigma_w^2 (1 + \|B\|^2) n \frac{\tau^4}{(1 - \bar{\rho}^2)^4} (\|Q\| + K_{\max}^2 \|R\|) \log(E/\delta) + \mathcal{O}(1) \\ &\leq \sigma_w^{2-2\alpha} (1 + \|B\|^2) \frac{d\tau^2}{1 - \bar{\rho}^2} (\|R\| + \|V_\star\| \|B\|^2) C_{\text{err}}^2 \frac{\alpha+1}{\alpha} \left(\frac{T+1}{T_{\text{mult}}}\right)^{\alpha/(\alpha+1)} \text{polylog}(T/\delta) \\ &\quad + T_{\text{mult}} \|B\|^2 J_\star \frac{\alpha+1}{\alpha} \left(\frac{T+1}{T_{\text{mult}}}\right)^{\alpha/(\alpha+1)} \\ &\quad + \mathcal{O}(1) \sqrt{nT} \sigma_w^2 (1 + \|B\|^2) n \frac{\tau^4}{(1 - \bar{\rho}^2)^4} (\|Q\| + K_{\max}^2 \|R\|) \log(T/\delta) + \mathcal{O}(1). \end{aligned}$$

The last inequality holds because:

$$\sum_{i=1}^{E-1} (2^i)^{\alpha/(1+\alpha)} \leq \int_1^E (2^x)^{\alpha/(1+\alpha)} dx \leq \frac{1}{\log 2} \frac{\alpha+1}{\alpha} (2^E)^{\alpha/(\alpha+1)} = \frac{1}{\log 2} \frac{\alpha+1}{\alpha} \left(\frac{T+1}{T_{\text{mult}}}\right)^{\alpha/(\alpha+1)}.$$

Now observe that we can bound

$$\begin{aligned} K_{\max} &\leq \Gamma_{\star}, \\ V_{\max} &\leq 4 \frac{\tau^2}{1-\rho^2} \Gamma_{\star}^3, \\ \Sigma_{\max} &\leq 4\sigma_w^2 n \Gamma_{\star}^2 \frac{\tau^2}{1-\rho^2}, \\ \frac{\tau^2}{1-\rho^2} &\leq \frac{\Gamma_{\star}^2}{\lambda_{\min}(S)^2}. \end{aligned}$$

Therefore:

$$\begin{aligned} \text{Regret}(T) &\leq \sigma_w^{2(1-\alpha)} d \frac{\Gamma_{\star}^7}{\lambda_{\min}(S)^2} C_{\text{err}}^2 \left( \frac{T+1}{T_{\text{mult}}} \right)^{\alpha/(\alpha+1)} \text{polylog}(T/\delta) \\ &\quad + T_{\text{mult}} \Gamma_{\star}^2 J_{\star} \left( \frac{T+1}{T_{\text{mult}}} \right)^{\alpha/(\alpha+1)} \\ &\quad + \mathcal{O}(1) n^{3/2} \sqrt{T} \sigma_w^2 \frac{\Gamma_{\star}^9}{\lambda_{\min}(S)^4} \log(T/\delta) + o_T(1). \end{aligned}$$

□

We now turn to the proof of Theorem 2.3 and analyze Algorithm 3 by applying Proposition C.4 with LSPI (Section B) taking the place of EstimateK. To apply Proposition C.4, we use Theorem 2.2 to compute the bounds  $C_{\text{req}}, C_{\text{err}}$  that are needed for Assumption 1 to hold. The following proposition will be used to work out these bounds.

**Proposition C.5.** *Let  $P_1 = \text{dlyap}(L, M_1)$  and  $P_2 = \text{dlyap}(L^{\top}, M_2)$ , and suppose both  $M_1$  and  $M_2$  are  $n \times n$  positive definite. We have that:*

$$\|P_1\| \leq n \frac{\|M_1\|}{\sigma_{\min}(M_2)} \|P_2\|.$$

*Proof.* We start with the observation that  $\text{tr}(M_2 P_1) = \text{tr}(M_1 P_2)$ . Then we lower bound  $\text{tr}(M_2 P_1) \geq \sigma_{\min}(M_2) \text{tr}(P_1) \geq \sigma_{\min}(M_2) \|P_1\|$ , and upper bound  $\text{tr}(M_1 P_2) \leq \|M_1\| \text{tr}(P_2) \leq n \|M_1\| \|P_2\|$ . □

We use Proposition C.5 to compute the following upper bound for  $P_{\infty}$ :

$$\|P_{\infty}\| \leq n \frac{\sigma_w^2 + \sigma_{\eta}^2 \|B\|^2}{\lambda_{\min}(S)} \|V_{\star}\| \leq \sigma_w^2 n \frac{\Gamma_{\star}^2}{\lambda_{\min}(S)}.$$

We first compute the  $C_{\text{req}}$  term from (2.12):

$$C_{\text{req}}(\|V^{(i)}\|) = \min \left\{ 1, \frac{2 \log(\|V^{(i)}\|/\lambda_{\min}(V_{\star}))}{e}, \frac{\|V_{\star}\|^2}{8\mu^2 \log(\|V^{(i)}\|/\lambda_{\min}(V_{\star}))} \right\}.$$

We see that  $C_{\text{req}}$  is monotonically decreasing in  $\|V^{(i)}\|$ .

Next we compute  $C_{\text{err}}$  from (2.14). First we see that  $\alpha = 2$ . Observing we can upper bound  $L \leq \Gamma_{\star}^2 \|V^{(i)}\|_{+}$ , we have that:

$$C_{\text{err}}(\|V^{(i)}\|, \|\Sigma_0^{(i)}\|) = \frac{\Gamma_{\star}^{94}}{(1 - \mu/(\Gamma_{\star}^2 \|V_{\star}\|_{+}))^2} \frac{\|V^{(i)}\|_{+}^{47}}{\mu^{43}} (n+d)^4 \sigma_w^2 \left( \|\Sigma_0^{(i)}\| + \sigma_w^2 n \frac{\Gamma_{\star}^2}{\lambda_{\min}(S)} + \sigma_w^2 \Gamma_{\star}^2 \right).$$

We see that  $C_{\text{err}}$  is monotonically increasing in both  $\|V^{(i)}\|$  and  $\|\Sigma_0^{(i)}\|$ . This gives the proof of Theorem 2.3.



## D Properties of the Invariant Metric

Here we review relevant properties of the invariant metric  $\delta_\infty(A, B) = \|\log(A^{-1/2}BA^{-1/2})\|$  over positive definite matrices.

**Lemma D.1** (c.f. [22]). *Suppose that  $A$  is positive semidefinite and  $X, Y$  are positive definite. Also suppose that  $M$  is invertible. We have:*

- (i)  $\delta_\infty(X, Y) = \delta_\infty(X^{-1}, Y^{-1}) = \delta_\infty(MXM^\top, MYM^\top)$ .
- (ii)  $\delta_\infty(A + X, A + Y) \leq \frac{\alpha}{\alpha + \beta} \delta_\infty(X, Y)$ , where  $\alpha = \max\{\lambda_{\max}(X), \lambda_{\max}(Y)\}$  and  $\beta = \lambda_{\min}(A)$ .

**Lemma D.2** (c.f. Theorem 4.4, [22]). *Consider the map  $f(X) = A + M(B + X^{-1})^{-1}M^\top$ , where  $A, B$  are PSD and  $X$  is positive definite. Suppose that  $X, Y$  are two positive definite matrices and  $A$  is invertible. We have:*

$$\delta_\infty(f(X), f(Y)) \leq \frac{\max\{\lambda_1(MXM^\top), \lambda_1(MYM^\top)\}}{\lambda_{\min}(A) + \max\{\lambda_1(MXM^\top), \lambda_1(MYM^\top)\}} \delta_\infty(X, Y).$$

*Proof.* We first assume that  $M$  is invertible. Using the properties of  $\delta_\infty$  from Lemma D.1, we have:

$$\begin{aligned} \delta_\infty(f(X), f(Y)) &= \delta_\infty(A + M(B + X^{-1})^{-1}M^\top, A + M(B + Y^{-1})^{-1}M^\top) \\ &\leq \frac{\alpha}{\lambda_{\min}(A) + \alpha} \delta_\infty(M(B + X^{-1})^{-1}M^\top, M(B + Y^{-1})^{-1}M^\top) \\ &= \frac{\alpha}{\lambda_{\min}(A) + \alpha} \delta_\infty((B + X^{-1})^{-1}, (B + Y^{-1})^{-1}) \\ &= \frac{\alpha}{\lambda_{\min}(A) + \alpha} \delta_\infty(B + X^{-1}, B + Y^{-1}) \\ &\leq \frac{\alpha}{\lambda_{\min}(A) + \alpha} \delta_\infty(X^{-1}, Y^{-1}) \\ &= \frac{\alpha}{\lambda_{\min}(A) + \alpha} \delta_\infty(X, Y), \end{aligned}$$

where  $\alpha = \max\{\lambda_{\max}(M(B + X^{-1})^{-1}M^\top), \lambda_{\max}(M(B + Y^{-1})^{-1}M^\top)\}$ . Now, we observe that:

$$B + X^{-1} \succeq X^{-1} \iff (B + X^{-1})^{-1} \preceq X.$$

This means that  $M(B + X^{-1})^{-1}M^\top \preceq MXM^\top$  and similarly  $M(B + Y^{-1})^{-1}M^\top \preceq MYM^\top$ . This proves the claim when  $M$  is invertible. When  $M$  is not invertible, use a standard limiting argument.  $\square$

**Proposition D.3.** *Suppose that  $A, B$  are positive definite matrices satisfying  $A \succeq \mu I$ ,  $B \succeq \mu I$ . We have that:*

$$\delta_\infty(A, B) \leq \frac{\|A - B\|}{\mu}.$$

*Proof.* We have that:

$$\|A^{-1/2}BA^{-1/2}\| = \|A^{-1/2}(B - A)A^{-1/2} + I\| \leq 1 + \frac{\|B - A\|}{\mu}.$$

Taking log on both sides and using  $\log(1 + x) \leq x$  for  $x \geq 0$  yields the claim.  $\square$

**Proposition D.4.** *Suppose that  $B \preceq A_1 \preceq A_2$  are all positive definite matrices. We have that:*

$$\delta_\infty(A_1, B) \leq \delta_\infty(A_2, B).$$

*Proof.* The chain of orderings implies that:

$$I \preceq B^{-1/2}A_1B^{-1/2} \preceq B^{-1/2}A_2B^{-1/2}.$$

Therefore:

$$\delta_\infty(A_1, B) = \log \lambda_{\max}(B^{-1/2}A_1B^{-1/2}) \leq \log \lambda_{\max}(B^{-1/2}A_2B^{-1/2}) = \delta_\infty(A_2, B).$$

Each step requires careful justification. The first equality holds because  $I \preceq B^{-1/2}A_1B^{-1/2}$  and the second inequality uses the monotonicity of the scalar function  $x \mapsto \log x$  on  $\mathbb{R}_+$  in addition to  $B^{-1/2}A_1B^{-1/2} \preceq B^{-1/2}A_2B^{-1/2}$ .  $\square$

**Proposition D.5.** *Suppose that  $A, B$  are positive definite matrices with  $B \succeq A$ . We have that:*

$$\|A - B\| \leq \|A\|(\exp(\delta_\infty(A, B)) - 1).$$

Furthermore, if  $\delta_\infty(A, B) \leq 1$  we have:

$$\|A - B\| \leq e\|A\|\delta_\infty(A, B).$$

*Proof.* The assumption that  $B \succeq A$  implies that  $A^{-1/2}BA^{-1/2} \succeq I$  and that  $\|A - B\| = \lambda_{\max}(B - A)$ . Now observe that:

$$\begin{aligned} \|A - B\| &= \lambda_{\max}(B - A) \\ &= \lambda_{\max}(A^{1/2}(A^{-1/2}BA^{-1/2} - I)A^{1/2}) \\ &\leq \|A\|\lambda_{\max}(A^{-1/2}BA^{-1/2} - I) \\ &= \|A\|(\lambda_{\max}(A^{-1/2}BA^{-1/2}) - 1) \\ &= \|A\|(\exp(\delta_\infty(A, B)) - 1). \end{aligned}$$

This yields the first claim. The second follows from the crude bound that  $e^x \leq 1 + ex$  for  $x \in (0, 1)$ .  $\square$

## E Useful Perturbation Results

Here we collect various perturbation results which are used in Section B.2.

**Lemma E.1** (Lemma B.1, [35]). *Suppose that  $K_0$  stabilizes  $(A, B)$ , and satisfies  $\|(A + BK_0)^k\| \leq \tau\rho^k$  for all  $k$  with  $\tau \geq 1$  and  $\rho \in (0, 1)$ . Suppose that  $K$  is a feedback matrix that satisfies  $\|K - K_0\| \leq \frac{1-\rho}{2\tau\|B\|}$ . Then we have that  $K$  stabilizes  $(A, B)$  and satisfies  $\|(A + BK)^k\| \leq \tau\text{Avg}(\rho, 1)^k$ .*

**Lemma E.2** (Lemma 1, [26]). *Let  $f_1, f_2$  be two  $\mu$ -strongly convex twice differentiable functions. Let  $x_1 = \arg \min_x f_1(x)$  and  $x_2 = \arg \min_x f_2(x)$ . Suppose  $\|\nabla f_1(x_2)\| \leq \varepsilon$ , then  $\|x_1 - x_2\| \leq \frac{\varepsilon}{\mu}$ .*

**Proposition E.3.** *Let  $M \succeq \mu I$  and  $N \succeq \mu I$  be a positive definite matrices partitioned as  $M = \begin{bmatrix} M_{11} & M_{12} \\ M_{12}^\top & M_{22} \end{bmatrix}$  and similarly for  $N$ . Let  $T(M) = -M_{22}^{-1}M_{12}^\top$ . We have that:*

$$\|T(M) - T(N)\| \leq \frac{(1 + \|T(N)\|)\|M - N\|}{\mu}.$$

*Proof.* Fix a unit norm  $x$ . Define  $f(u) = (1/2)x^\top M_{11}x + (1/2)u^\top M_{22}u + x^\top M_{12}u$  and  $g(u) = (1/2)x^\top N_{11}x + (1/2)u^\top N_{22}u + x^\top N_{12}u$ . Let  $u_\star = T(N)x$ . We have that

$$\nabla f(u_\star) = \nabla f(u_\star) - \nabla g(u_\star) = (M_{22} - N_{22})u_\star + (M_{12} - N_{12})^\top x.$$

Hence,  $\|\nabla f(u_\star)\| \leq \|M_{12} - N_{12}\| + \|M_{22} - N_{22}\|\|u_\star\|$ . We can bound  $\|u_\star\| = \|T(N)x\| \leq \|T(N)\|$ . The claim now follows using Lemma E.2.  $\square$

**Proposition E.4.** *Let  $K, K_0$  be two stabilizing policies for  $(A, B)$ . Let  $V, V_0$  denote their respective value functions and suppose that  $V \preceq V_0$ . We have that for all  $k \geq 0$ :*

$$\|(A + BK)^k\| \leq \sqrt{\frac{\lambda_{\max}(V_0)}{\lambda_{\min}(S)}}(1 - \lambda_{\min}(V_0^{-1}S))^{k/2}.$$

*Proof.* This proof is inspired by the proof of Lemma 5.1 of Abbasi-Yadkori et al. [3]. Since  $V$  is the value function for  $K$ , we have:

$$\begin{aligned} V &= (A + BK)^\top V (A + BK) + S + K^\top R K \\ &\succeq (A + BK)^\top V (A + BK) + S. \end{aligned}$$

Conjugating both sides by  $V^{-1/2}$  and defining  $H := V^{1/2}(A + BK)V^{-1/2}$ ,

$$\begin{aligned} I &\succeq V^{-1/2}(A + BK)^\top V (A + BK)V^{-1/2} + V^{-1/2}SV^{-1/2} \\ &= H^\top H + V^{-1/2}SV^{-1/2}. \end{aligned}$$

This implies that  $\|H\|^2 = \|H^\top H\| \leq \|I - V^{-1/2}SV^{-1/2}\| = 1 - \lambda_{\min}(S^{1/2}V^{-1}S^{1/2}) \leq 1 - \lambda_{\min}(S^{1/2}V_0^{-1}S^{1/2})$ . The last inequality holds since  $V \preceq V_0$  iff  $V^{-1} \succeq V_0^{-1}$ . Now observe:

$$\|V^{1/2}(A + BK)^k V^{-1/2}\| = \|H^k\| \leq \|H\|^k \leq (1 - \lambda_{\min}(V_0^{-1}S))^{k/2}$$

Next, for  $M$  positive definite and  $N$  square, observe that:

$$\begin{aligned} \|MNM^{-1}\| &= \sqrt{\lambda_{\max}(MNM^{-2}N^\top M)} \\ &\geq \sqrt{\lambda_{\min}(M^{-2})\lambda_{\max}(MNN^\top M)} \\ &= \sqrt{\lambda_{\min}(M^{-2})\lambda_{\max}(N^\top M^2 N)} \\ &\geq \sqrt{\lambda_{\min}(M^{-2})\lambda_{\min}(M^2)\|N\|^2} \\ &= \frac{\|N\|}{\kappa(M)}. \end{aligned}$$

Therefore, we have shown that:

$$\|(A + BK)^k\| \leq \sqrt{\kappa(V)}(1 - \lambda_{\min}(V_0^{-1}S))^{k/2} \leq \sqrt{\frac{\lambda_{\max}(V_0)}{\lambda_{\min}(S)}}(1 - \lambda_{\min}(V_0^{-1}S))^{k/2}.$$

□

**Proposition E.5.** Let  $A$  be a  $(\tau, \rho)$  stable matrix, and let  $\|\cdot\|$  be either the operator or Frobenius norm. We have that:

$$\|\text{dlyap}(A, M)\| \leq \frac{\tau^2}{1 - \rho^2} \|M\|. \quad (\text{E.1})$$

*Proof.* It is a well known fact that we can write  $P = \sum_{k=0}^{\infty} (A^k)^\top M (A^k)$ . Therefore the bound follows from triangle inequality and the  $(\tau, \rho)$  stability assumption. □

**Proposition E.6.** Suppose that  $A_1, A_2$  are stable matrices. Suppose furthermore that  $\|A_i^k\| \leq \tau\rho^k$  for some  $\tau \geq 1$  and  $\rho \in (0, 1)$ . Let  $Q_1, Q_2$  be PSD matrices. Put  $P_i = \text{dlyap}(A_i, Q_i)$ . We have that:

$$\|P_1 - P_2\| \leq \frac{\tau^2}{1 - \rho^2} \|Q_1 - Q_2\| + \frac{\tau^4}{(1 - \rho^2)^2} \|A_1 - A_2\|(\|A_1\| + \|A_2\|)\|Q_2\|.$$

*Proof.* Let the linear operators  $F_1, F_2$  be such that  $P_i = F_i^{-1}(Q_i)$ , i.e.  $F_i(X) = X - A_i^\top X A_i$ . Then:

$$\begin{aligned} P_1 - P_2 &= F_1^{-1}(Q_1) - F_2^{-1}(Q_2) \\ &= F_1^{-1}(Q_1 - Q_2) + F_1^{-1}(Q_2) - F_2^{-1}(Q_2) \\ &= F_1^{-1}(Q_1 - Q_2) + (F_1^{-1} - F_2^{-1})(Q_2). \end{aligned}$$

Hence  $\|P_1 - P_2\| \leq \|F_1^{-1}\| \|Q_1 - Q_2\| + \|F_1^{-1} - F_2^{-1}\| \|Q_2\|$ . Now for any  $M$  satisfying  $\|M\| \leq 1$

$$\|F_i^{-1}(M)\| = \left\| \sum_{k=0}^{\infty} (A_i^\top)^k M A_i^k \right\| \leq \frac{\tau^2}{1 - \rho^2}.$$

Next, we have that:

$$\|F_1^{-1} - F_2^{-1}\| = \|F_1^{-1}(F_2 - F_1)F_2^{-1}\| \leq \|F_1^{-1}\| \|F_2^{-1}\| \|F_1 - F_2\| \leq \frac{\tau^4}{(1 - \rho^2)^2} \|F_1 - F_2\|.$$

Now for any  $M$  satisfying  $\|M\| \leq 1$ ,

$$\begin{aligned} \|F_1(M) - F_2(M)\| &= \|A_2^\top M A_2 - A_1^\top M A_1\| \\ &= \|(A_2 - A_1)^\top M A_2 + A_1^\top M (A_2 - A_1)\| \\ &\leq \|A_1 - A_2\| (\|A_1\| + \|A_2\|). \end{aligned}$$

The claim now follows.  $\square$

## F Useful Implicit Inversion Results

**Proposition F.1.** *Let  $T \geq 2$  and suppose that  $\alpha \geq 1$ . Define  $\varepsilon$  as:*

$$\varepsilon = \inf \left\{ \varepsilon \in (0, 1) : T \geq \frac{1}{\varepsilon^2} \log^\alpha(1/\varepsilon) \right\},$$

*then we have*

$$\varepsilon \leq \frac{\log^{(\alpha+1)/2}(T)}{\sqrt{T}}.$$

*As a corollary, if  $T \geq 2C$  then if we define  $\varepsilon$  as:*

$$\varepsilon = \inf \left\{ \varepsilon \in (0, 1) : T \geq \frac{C}{\varepsilon^2} \log^\alpha(1/\varepsilon) \right\},$$

*then we have*

$$\varepsilon \leq \sqrt{\frac{C}{T}} \log^{(\alpha+1)/2}(T/C).$$

*Proof.* First, we know that such a  $\varepsilon$  exists by continuity because  $\lim_{\varepsilon \rightarrow 1^-} \frac{1}{\varepsilon^2} \log^\alpha(1/\varepsilon) = 0$ .

Suppose towards a contradiction that  $\varepsilon > \log^\beta(T)/\sqrt{T}$  where  $2\beta = \alpha + 1$ . Note that we must have  $\log^\beta(T)/\sqrt{T} < 1$ , since if we did not, we would have

$$1 \geq \varepsilon > \log^\beta(T)/\sqrt{T} \geq 1.$$

Therefore, by the definition of  $\varepsilon$ ,

$$T < \frac{T}{\log^{2\beta}(T)} \log^\alpha(\sqrt{T}/\log^\beta(T)) \leq \frac{T}{\log^{2\beta}(T)} \log^\alpha(\sqrt{T}).$$

This implies that:

$$\log^{2\beta}(T) \leq \log^\alpha(\sqrt{T}) = \frac{1}{2^\alpha} \log^\alpha(T).$$

Using the fact that  $2\beta = \alpha + 1$ , this implies:

$$\log(T) \leq 1/2^\alpha \implies T \leq \exp(1/2^\alpha) \leq \exp(1/2).$$

But this contradicts the assumption that  $T \geq 2$ .

The corollary follows from a change of variables  $T \leftarrow T/C$ .  $\square$

**Proposition F.2.** *Let  $C \geq 1$  and  $\alpha \geq 1$ . We have that:*

$$\sup_{i=0,1,2,\dots} \frac{1}{(2^i)^{1/\alpha}} \text{polylog}(C2^i) \leq \text{poly}(\alpha) \text{polylog}(C).$$

*Proof.* Let  $\beta \geq 1$ . We have that:

$$\begin{aligned} \frac{1}{(2^i)^{1/\alpha}} \log^\beta(C 2^i) &= \frac{1}{(2^i)^{1/\alpha}} (\log(C) + \log(2^i))^\beta \\ &\leq \frac{2^{\beta-1}}{(2^i)^{1/\alpha}} (\log^\beta(C) + \log^\beta(2^i)) \\ &\leq 2^{\beta-1} \log^\beta(C) + 2^{\beta-1} \frac{i^\beta}{(2^i)^{1/\alpha}} \log^\beta(2). \end{aligned}$$

Next, we look at:

$$f(i) := \frac{i^\beta}{(2^i)^{1/\alpha}}.$$

We have that:

$$\frac{d}{di} \log_2 f(i) = \frac{\beta}{i \log 2} - \frac{1}{\alpha}.$$

Setting the derivative to zero we obtain that  $i = \alpha\beta / \log 2$ . Therefore:

$$\sup_{i=0,1,2,\dots} f(i) \leq \beta \left( \frac{\alpha\beta}{\log 2} \right)^\beta.$$

The claim now follows. □

**Proposition F.3.** *Let  $C > 0$ . Then for any  $\varepsilon \in (0, \min\{1/e, C^2\})$ , we have the following inequality holds:*

$$\varepsilon \log(1/\varepsilon) \leq C.$$

*As a corollary, let  $M > 0$ , then for  $\varepsilon \in (0, \min\{M/e, C^2/M\})$  we have that:*

$$\varepsilon \log(M/\varepsilon) \leq C.$$

*Proof.* Let  $f(\varepsilon) := \varepsilon \log(1/\varepsilon)$ . We have that  $\lim_{\varepsilon \rightarrow 0^+} f(\varepsilon) = 0$  and that  $f'(\varepsilon) = \log(1/\varepsilon) - 1$ . Hence  $f$  is increasing on the interval  $\varepsilon \in [0, 1/e]$ , and  $f(1/e) = 1/e$ . Therefore, if  $C \geq 1/e$  then  $f(\varepsilon) \leq C$  for any  $\varepsilon \in (0, 1/e)$ .

Now suppose that  $C < 1/e$ . One can verify that the function  $g(x) := 1/x + 2 \log x$  satisfies  $g(x) \geq 0$  for all  $x > 0$ . Therefore:

$$\begin{aligned} g(C) \geq 0 &\iff 1/C + 2 \log C \geq 0 \\ &\iff 1/C \geq \log(1/C^2) \\ &\iff C \geq C^2 \log(1/C^2) \\ &\iff f(C^2) \leq C. \end{aligned}$$

Since  $C < 1/e$  we have  $C^2 \leq C$  and therefore  $f(\varepsilon) \leq f(C^2) \leq C$  for all  $\varepsilon \in (0, C^2)$ . This proves the first part.

To see the second part, use the variable substitution  $\varepsilon \leftarrow \varepsilon/M$ ,  $C \leftarrow C/M$ . □

**Proposition F.4.** *Let  $\beta \geq 1$  and  $C \geq (e/\beta)^\beta$ . Let  $x$  denote the solution to:*

$$x = C \log^\beta(x).$$

*We have that  $x \leq e^{(\alpha-1)\beta} \beta^\beta \cdot C \log^\beta(\beta C^{1/\beta})$ , where  $\alpha = 2 - \log(e-1)$ .*

*Proof.* Let  $W(\cdot)$  denote the Lambert  $W$  function. It is simple to check that  $x = \exp(-\beta W(-\frac{1}{\beta C^{1/\beta}}))$  satisfies  $x = C \log^\beta(x)$ . From Theorem 3.2 of [?], we have that for any  $t > 0$ :

$$W(-e^{-t-1}) > -\log(t+1) - t - \alpha, \quad \alpha = 2 - \log(e-1).$$

We now write:

$$\begin{aligned}
W\left(-\frac{1}{\beta C^{1/\beta}}\right) &= W\left(-e^{\log(\frac{1}{\beta C^{1/\beta}})}\right) \\
&= W\left(-e^{-\log(\beta C^{1/\beta})}\right) \\
&= W(-e^{-t-1}), \quad t = \log(\beta C^{1/\beta}) - 1 \\
&> -\log(t+1) - t - \alpha.
\end{aligned}$$

where the last inequality uses the result from Alzahrani and Salem and the assumption that  $C \geq (e/\beta)^\beta$ . We now upper bound  $x$ :

$$\begin{aligned}
x &= \exp\left(-\beta W\left(-\frac{1}{\beta C^{1/\beta}}\right)\right) \\
&\leq \exp(\beta \log(t+1) + \beta t + \alpha\beta) \\
&= \exp(\beta \log \log(\beta C^{1/\beta})) \exp(\beta \log(\beta C^{1/\beta})) \exp((\alpha-1)\beta) \\
&= \exp((\alpha-1)\beta) \beta^\beta C \log^\beta(\beta C^{1/\beta}).
\end{aligned}$$

□

## G Experimental Evaluation Details

In this section we briefly describe the other algorithms we evaluate in Section 4, and also describe how we tune the parameters of these algorithms for the experiments.

Define the function  $J(K; W)$  as:

$$J(K; W) := \lim_{T \rightarrow \infty} \mathbb{E} \left[ \frac{1}{T} \sum_{t=1}^T x_t^\top S x_t + u_t^\top R u_t \right] \quad (\text{G.1a})$$

$$\text{s.t. } x_{t+1} = A x_t + B u_t + w_t, \quad u_t = K x_t, \quad w_t \sim \mathcal{N}(0, W). \quad (\text{G.1b})$$

Certainty equivalence (nominal) control uses data to estimate a model  $(\hat{A}, \hat{B}) \approx (A, B)$  and then solve for the optimal controller to (G.1) via the Riccati equations. On the other hand, both policy gradients and DFO are derivative-free random search algorithms on  $J(K; W)$ . For policy gradients, one uses action-space perturbations to obtain an unbiased estimate of the gradient of  $J(K; \sigma_w^2 I + \sigma_\eta^2 B B^\top)$ . For DFO, random finite differences are used to obtain an unbiased estimate of the gradient of  $J_{\sigma_\eta}(K) := \mathbb{E}_\xi [J(K + \sigma_\eta \xi; \sigma_w^2 I)]$ , where each entry of  $\xi$  is drawn i.i.d. from  $\mathcal{N}(0, 1)$ . Below, we describe each method in more detail.

**Certainty equivalence (nominal) control.** The certainty equivalence (nominal) controller solves (G.1) by first constructing an estimate  $(\hat{A}, \hat{B}) \approx (A, B)$  and then outputting the estimated controller  $\hat{K}$  via:

$$\begin{aligned}
\hat{K} &= -(\hat{B}^\top \hat{P} \hat{B} + R)^{-1} \hat{B}^\top \hat{P} \hat{A}, \\
\hat{P} &= \text{dare}(\hat{A}, \hat{B}, S, R).
\end{aligned}$$

The estimates  $(\hat{A}, \hat{B})$  are constructed via least-squares. In particular,  $N$  trajectories each of length  $T$  are collected  $\{x_t^{(i)}\}_{t=1, i=1}^{T, N}$  using the random input sequence  $u_t^{(i)} \sim \mathcal{N}(0, \sigma_u^2 I)$ , and  $(\hat{A}, \hat{B})$  are formed as the solution to:

$$(\hat{A}, \hat{B}) = \arg \min_{(A, B)} \frac{1}{2} \sum_{i=1}^N \sum_{t=1}^{T-1} \|x_{t+1}^{(i)} - A x_t^{(i)} - B u_t^{(i)}\|^2.$$

For our experiments, we set  $\sigma_u = 1$ .

**Policy gradients.** The gradient estimator works as follows. A large horizon length  $T$  is fixed. A trajectory  $\{x_t\}$  is rollout out for  $T$  timesteps with the input sequence  $u_t = Kx_t + \eta_t$ , with  $\eta_t \sim \mathcal{N}(0, \sigma_\eta^2 I)$ . Let  $\tau_{s:t} = (x_s, u_s, x_{s+1}, u_{s+1}, \dots, x_t, u_t)$  denote a sub-trajectory, and let  $c(\tau_{s:t})$  denote the LQR cost over this sub-trajectory, i.e.  $c(\tau_{s:t}) = \sum_{k=s}^t x_k^\top S x_k + u_k^\top R u_k$ . The policy gradient estimate is:

$$\hat{g} = \frac{1}{T} \sum_{t=1}^T \frac{c(\tau_{t:T})}{\sigma_\eta^2} \eta_t x_t^\top.$$

Of course, one can use a baseline function  $b(\tau_{1:t-1}, x_t)$  for variance reduction as follows:

$$\hat{g} = \frac{1}{T} \sum_{t=1}^T \frac{c(\tau_{t:T}) - b(\tau_{1:t-1}, x_t)}{\sigma_\eta^2} \eta_t x_t^\top.$$

**DFO.** We use the two point estimator. As in policy gradients, we fix a horizon length  $T$ . We first draw a random perturbation  $\xi$ . Then, we rollout one trajectory  $\{x_t\}_{t=1}^T$  with  $u_t = (K + \sigma_\eta \xi)x_t$ , and we rollout another trajectory  $\{x'_t\}_{t=1}^T$  with  $u'_t = (K - \sigma_\eta \xi)x'_t$ . We then use the gradient estimator:

$$\hat{g} = \frac{\frac{1}{T} \sum_{t=1}^T c_t - \frac{1}{T} \sum_{t=1}^T c'_t}{2\sigma_\eta} \xi, \quad c_t = x_t^\top S x_t + u_t^\top R u_t, \quad c'_t = (x'_t)^\top S x'_t + (u'_t)^\top R u'_t.$$

**MFLQ.** We update the policy every 100 iterations and do not execute a random exploratory action since we found that it negatively affected the performance of the algorithm in practice. In terms of the parameters described in Algorithm 1 of Abbasi-Yadkori et al. [3] we execute v2 of the algorithm and set  $T_s = \infty$  and  $T_v = 100$ . We also chose to use all data collected throughout an experiment when updating the policy.

**Optimal.** The optimal controller simply solves for the optimal controller to G.1 given the true matrices  $A$  and  $B$ . That is, it uses the controller

$$K = -(B^\top P B + R)^{-1} B^\top P A, \\ P = \text{dare}(A, B, S, R).$$

**Offline setup details.** Recall that we use stochastic gradient descent with a constant step size  $\mu$  as the optimizer for both policy gradients and DFO. After every iteration, we project the iterate  $K_t$  onto the set  $\{K : \|K\|_F \leq 5\|K_\star\|_F\}$ , where  $K_\star$  is the optimal LQR controller (we assume the value  $\|K_\star\|_F$  is known for simplicity). We tune the parameters of each algorithm as follows. We consider a grid of step sizes  $\mu$  given by  $[10^{-3}, 10^{-4}, 10^{-5}, 10^{-6}]$  and a grid of  $\sigma_\eta$ 's given by  $[1, 10^{-1}, 10^{-2}, 10^{-3}]$ . We fix the rollout horizon length  $T = 100$  and choose the pair of  $(\sigma_\eta, \mu)$  in the grid which yields the lowest cost after  $10^6$  timesteps. This resulted in the pair  $(\sigma_\eta, \mu) = (1, 10^{-5})$  for policy gradients and  $(\sigma_\eta, \mu) = (10^{-3}, 10^{-4})$  for DFO. As mentioned above, we use the two point evaluation for derivative-free optimization, so each iteration requires  $2T$  timesteps. For policy gradient, we evaluate two different baselines  $b_t$ . One baseline, which we call the *simple* baseline, uses the empirical average cost  $b = \frac{1}{T} \sum_{t=1}^T c_t$  from the previous iteration as a constant baseline. The second baseline, which we call the *value function* baseline, uses  $b(x) = x^\top V(K)x$  with  $V(K) = \text{dlyap}(A + BK, S + K^\top R K)$  as the baseline. We note that using this baseline requires exact knowledge of the dynamics  $(A, B)$ ; it can however be estimated from data at the expense of additional sample complexity (c.f. Section 2.1). For the purposes of this experiment, we simply assume the baseline is available to us.

**Online setup details.** In the online setting we warm-start every algorithm by first collecting 2000 datapoints collected by feeding the input  $Kx_t + \eta_t$  to the system where  $K$  is a stabilizing controller and  $\eta_t$  is Gaussian distributed additive noise with standard deviation 1. We then run each algorithm for 10,000 iterations. In the case of LSPI we set the initial number of policy iterations  $N$  to be 3 and subsequently increase it to 4 at 2000 iterations, 5 at 4000 iterations, and 6 at 6000 iterations. We also follow the experimental methodology of Dean et al. [13] and set  $T_i = 10(i+1)$  and set  $\sigma_{\eta,i}^2 = 0.01 \left(\frac{1}{i+1}\right)^{2/3}$  where  $i$  is the epoch number. Finally we repeat each experiment for 100 trials.

### G.1 Additional Experiments

In this section we include the results of additional experiments we ran in the online setting. We ran the nominal, LSPI, and MFLQ algorithms in the same online setting described previously, keeping track of relative error  $(J(\hat{K}) - J_*)/J_*$  between the current controller and the optimal controller.

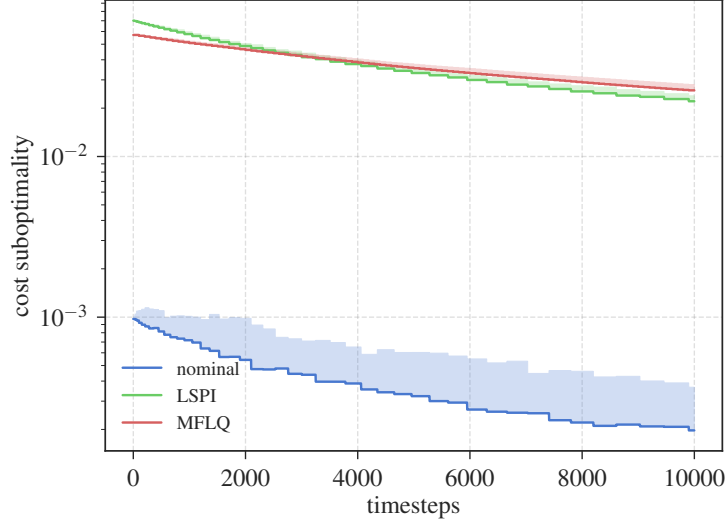

**Figure 2:** The cost suboptimality of MFLQ, LSPI, and the nominal controller when compared with the baseline of the optimal controller in the adaptive setting. The shaded regions represent the median to upper 90th percentile over 100 trials. Here, LSPI is Algorithm 3 using LSPIv1, MFLQ is from Abbasi-Yadkori et al. [3], nominal is the  $\epsilon$ -greedy adaptive certainty equivalent controller (c.f. [13]), and optimal has access to the true dynamics.

As Figure 2 shows, both LSPI and MFLQ perform similarly with LSPI slightly outperforming MFLQ towards the end of the experiment. Nominal significantly outperforms both model-free algorithms.
